# Supplementary material for: Evaluation of Intensive vs Standard Blood Pressure Reduction and Association With Cognitive Decline and Dementia: A Systematic Review and Meta-analysis
Source: PubMed Central journal article supplement (PMC8609411; doi:10.1001/jamanetworkopen.2021.34553), 2021-11-22
Supplement: jamanetwopen-e2134553-s001.pdf [file jamanetwopen-e2134553-s001.pdf]

## Supplemental Online Content

Dallaire-Théroux C, Quesnel-Olivo MH, Brochu K, et al. Evaluation of intensive vs standard blood pressure reduction and association with cognitive decline and dementia: a systematic review and meta-analysis. *JAMA Netw Open*. 2021;4(11):e2134553. doi:10.1001/jamanetworkopen.2021.34553

**eTable 1.** Database Search Strategy

**eTable 2.** Additional Demographic Characteristics of Studies Included in Quantitative Analyses

**eTable 3.** Subgroup Analysis for the Outcome of Cognitive Decline

**eTable 4.** Subgroup Analysis for the Outcome of Probable Dementia

**eTable 5.** Subgroup Analysis for the Outcome of Mild Cognitive Impairment

**eTable 6.** Subgroup Analysis for the Outcome of Cerebrovascular Events

**eTable 7.** Subgroup Analysis for the Outcome of Serious Adverse Events

**eTable 8.** Subgroup Analysis for the Outcome of All-Cause Mortality

**eFigure.** Sensitivity Analysis Using Fixed-Effect Model for the Incidence of Probable Dementia

This supplemental material has been provided by the authors to give readers additional information about their work.

## eTable 1. Database Search Strategy

### a. PubMed

Date of the search: 27-10-2020

Database limit: No database limit has been applied

| Concepts                                            | # | Search strategy                                                                                                                                                                                                                                                                                                                                                                                                                                                                                                                                                                                                                                                                                                                                                                                                                                                                                                                                                                                                                                                                                                                                                                                                                                                                                                                        | Results   |
|-----------------------------------------------------|---|----------------------------------------------------------------------------------------------------------------------------------------------------------------------------------------------------------------------------------------------------------------------------------------------------------------------------------------------------------------------------------------------------------------------------------------------------------------------------------------------------------------------------------------------------------------------------------------------------------------------------------------------------------------------------------------------------------------------------------------------------------------------------------------------------------------------------------------------------------------------------------------------------------------------------------------------------------------------------------------------------------------------------------------------------------------------------------------------------------------------------------------------------------------------------------------------------------------------------------------------------------------------------------------------------------------------------------------|-----------|
| Adult population<br>(Controlled vocabulary)         | 1 | Adult[MeSH]                                                                                                                                                                                                                                                                                                                                                                                                                                                                                                                                                                                                                                                                                                                                                                                                                                                                                                                                                                                                                                                                                                                                                                                                                                                                                                                            | 7,274,737 |
| Adult population<br>(Free vocabulary)               | 2 | Adult*[tiab] OR elder*[tiab] OR senior[tiab] OR aged[tiab] OR middle age[tiab] OR geriatric*[tiab] OR old person*[tiab] OR old patient[tiab] OR old people[tiab] OR older person*[tiab] OR older patient[tiab] OR older people[tiab]                                                                                                                                                                                                                                                                                                                                                                                                                                                                                                                                                                                                                                                                                                                                                                                                                                                                                                                                                                                                                                                                                                   | 2,059,980 |
| Adult population<br>(Combined)                      | 3 | #1 OR #2                                                                                                                                                                                                                                                                                                                                                                                                                                                                                                                                                                                                                                                                                                                                                                                                                                                                                                                                                                                                                                                                                                                                                                                                                                                                                                                               | 8,241,625 |
| Blood pressure reduction<br>(Controlled vocabulary) | 4 | Antihypertensive Agents[MeSH] OR "Antihypertensive Agents" [Pharmacological Action] OR "Diuretics" [Pharmacological Action] OR "Diuretics"[Mesh] OR "Thiazides"[Mesh] OR "Calcium Channel Blockers"[Mesh] OR "Angiotensin-Converting Enzyme Inhibitors"[Mesh] OR "Angiotensin-Converting Enzyme Inhibitors" [Pharmacological Action] OR "Adrenergic beta-Antagonists" [Pharmacological Action]                                                                                                                                                                                                                                                                                                                                                                                                                                                                                                                                                                                                                                                                                                                                                                                                                                                                                                                                         | 391,258   |
| Blood pressure reduction<br>(Free vocabulary)       | 5 | antihypertens*[tiab] OR anti-hypertens*[tiab] OR diuretic*[tiab] OR thiazide*[tiab] OR Calcium Channel Blocker*[tiab] OR Calcium Channel Antagonist*[tiab] OR calcium antagonist*[tiab] OR Angiotensin Converting Enzyme Inhibitors[tiab] OR ACE Inhibitors[tiab] OR angiotensin receptor blocker*[TIAB] OR beta Adrenergic Blockers[TIAB] OR beta-Adrenergic Antagonists[TIAB] OR "Adrenergic alpha-2 Receptor Agonists"[Mesh] OR beta-blocker*[TIAB] OR beta-Antagonist*[TIAB] OR alpha-2 agonist*[TIAB] OR alpha-1 blocker*[TIAB] OR Acebutolol[TIAB] OR Adrenomedullin[TIAB] OR AE0047[TIAB] OR alacepril[TIAB] OR Alprenolol[TIAB] OR ambrisentan[TIAB] OR Amlodipine[TIAB] OR amosulalol[TIAB] OR angiotensin I[TIAB] OR aprikalim[TIAB] OR Atenolol[TIAB] OR atrial natriuretic factor prohormone[TIAB] OR azepevole[TIAB] OR benazepril*[TIAB] OR bendazole[TIAB] OR Bendroflumethiazide[TIAB] OR benoxathian[TIAB] OR Bepridil[TIAB] OR berbamine[TIAB] OR Betaxolol[TIAB] OR Bethanidine[TIAB] OR bietaserpine[TIAB] OR bimakalim[TIAB] OR Bimatoprost[TIAB] OR Bisoprolol[TIAB] OR Bosentan[TIAB] OR BQ 22-708[TIAB] OR BQ 788[TIAB] OR Bretylium Tosylate[TIAB] OR Brimonidine Tartrate[TIAB] OR budralazine[TIAB] OR Bupranolol[TIAB] OR buthiazide[TIAB] OR cadralazine[TIAB] OR cafedrine[TIAB] OR candesartan[TIAB] OR | 360,806   |

|  |                                                                                                                                                                                                                                                                                                                                                                                                                                                                                                                                                                                                                                                                                                                                                                                                                                                                                                                                                                                                                                                                                                                                                                                                                                                                                                                                                                                                                                                                                                                                                                                                                                                                                                                                                                                                                                                                                                                                                                                                                                                                                                                                                                                                                                                                                                                                                                                                                                                                                                                                                                                                                                                                                                                                                                                                             |  |
|--|-------------------------------------------------------------------------------------------------------------------------------------------------------------------------------------------------------------------------------------------------------------------------------------------------------------------------------------------------------------------------------------------------------------------------------------------------------------------------------------------------------------------------------------------------------------------------------------------------------------------------------------------------------------------------------------------------------------------------------------------------------------------------------------------------------------------------------------------------------------------------------------------------------------------------------------------------------------------------------------------------------------------------------------------------------------------------------------------------------------------------------------------------------------------------------------------------------------------------------------------------------------------------------------------------------------------------------------------------------------------------------------------------------------------------------------------------------------------------------------------------------------------------------------------------------------------------------------------------------------------------------------------------------------------------------------------------------------------------------------------------------------------------------------------------------------------------------------------------------------------------------------------------------------------------------------------------------------------------------------------------------------------------------------------------------------------------------------------------------------------------------------------------------------------------------------------------------------------------------------------------------------------------------------------------------------------------------------------------------------------------------------------------------------------------------------------------------------------------------------------------------------------------------------------------------------------------------------------------------------------------------------------------------------------------------------------------------------------------------------------------------------------------------------------------------------|--|
|  | <p> candoxatril[TIAB] OR Captopril[TIAB] OR Carteolol[TIAB]<br/> OR Carvedilol[TIAB]<br/> OR Celiprolol[TIAB] OR ceronapril[TIAB] OR<br/> Chlorisondamine[TIAB]<br/> OR Chlorothiazide[TIAB] OR Chlorthalidone[TIAB] OR<br/> cicletanine[TIAB] OR Cilazapril[TIAB] OR cilazaprilat[TIAB]<br/> OR clentiazem[TIAB] OR Clonidine[TIAB]<br/> OR Cromakalim[TIAB] OR cyclo[TIAB] OR<br/> Cyclopenthiiazide[TIAB] OR cyclothiazide[TIAB] OR<br/> dauricine[TIAB] OR Debrisoquin[TIAB] OR delapril[TIAB]<br/> OR diallyl disulfide[TIAB] OR Diazoxide[TIAB] OR<br/> Dihydralazine[TIAB] OR Dihydroalprenolol[TIAB] OR<br/> Diltiazem[TIAB] OR dorzolamide[TIAB] OR<br/> Doxazosin[TIAB] OR efonidipine[TIAB] OR<br/> Enalapril*[TIAB] OR epanolol[TIAB] OR Eplerenone[TIAB]<br/> OR Epoprostenol[TIAB] OR eprosartan[TIAB] OR<br/> essential 303 forte[TIAB] OR etozolin[TIAB] OR<br/> Felodipine[TIAB] OR Fenoldopam[TIAB] OR ferulic<br/> acid[TIAB] OR FK 409[TIAB] OR flesinoxan[TIAB] OR<br/> Fosinopril*[TIAB] OR grayanotoxin I[TIAB] OR<br/> Guanabenz[TIAB] OR guanadrel[TIAB] OR<br/> Guanethidine[TIAB] OR Guanfacine[TIAB] OR<br/> Hexamethonium[TIAB]<br/> OR Hydralazine[TIAB] OR Hydrochlorothiazide[TIAB] OR<br/> Hydroflumethiazide[TIAB] OR imidapril[TIAB] OR<br/> Indapamide[TIAB] OR indenolol[TIAB] OR<br/> Indoramin[TIAB] OR indorenate[TIAB] OR<br/> Irbesartan[TIAB] OR isopropyl unoprostone[TIAB] OR<br/> Isradipine[TIAB]<br/> OR Kallidin[TIAB] OR Ketanserin[TIAB] OR L<br/> 158809[TIAB] OR Labetalol[TIAB]<br/> OR lacidipine[TIAB] OR Latanoprost[TIAB] OR<br/> lercanidipine[TIAB] OR libenzapril[TIAB] OR<br/> linsidomine[TIAB] OR Lisinopril[TIAB] OR lofexidine[TIAB]<br/> OR Losartan[TIAB] OR manidipine[TIAB] OR<br/> Mecamylamine[TIAB] OR medroxalol[TIAB] OR medullipin<br/> I[TIAB] OR Methyldopa[TIAB]<br/> OR Metipranolol[TIAB] OR Metolazone[TIAB] OR<br/> Metoprolol[TIAB] OR Mibefradil[TIAB] OR Minoxidil[TIAB]<br/> OR moexipril[TIAB] OR monatepil[TIAB]<br/> OR moxonidine[TIAB] OR Muzolimine[TIAB] OR<br/> Nadolol[TIAB] OR naftopidil[TIAB] OR Nebivolol[TIAB] OR<br/> Nicardipine[TIAB] OR Nicorandil[TIAB] OR<br/> niguldipine[TIAB] OR nilvadipine[TIAB] OR<br/> Nimodipine[TIAB] OR NIP 121[TIAB] OR nipradilol[TIAB]<br/> OR Nisoldipine[TIAB]<br/> OR Nitrendipine[TIAB] OR Nitroprusside[TIAB] OR<br/> oleuropein[TIAB] OR olmesartan[TIAB] OR<br/> omapatrilat[TIAB] OR Oxprenolol[TIAB] OR<br/> Pargyline[TIAB] OR Pempidine[TIAB] OR<br/> Penbutolol[TIAB] OR Pentolinium Tartrate[TIAB] OR<br/> Perindopril*[TIAB] OR Phenoxybenzamine[TIAB] OR<br/> Phentolamine[TIAB] OR Pinacidil[TIAB] OR Pindolol[TIAB]<br/> OR Piperoxan[TIAB]<br/> OR Polythiazide[TIAB] OR Prazosin[TIAB] OR<br/> Propranolol[TIAB] OR Protoveratrine[TIAB] OR </p> |  |
|--|-------------------------------------------------------------------------------------------------------------------------------------------------------------------------------------------------------------------------------------------------------------------------------------------------------------------------------------------------------------------------------------------------------------------------------------------------------------------------------------------------------------------------------------------------------------------------------------------------------------------------------------------------------------------------------------------------------------------------------------------------------------------------------------------------------------------------------------------------------------------------------------------------------------------------------------------------------------------------------------------------------------------------------------------------------------------------------------------------------------------------------------------------------------------------------------------------------------------------------------------------------------------------------------------------------------------------------------------------------------------------------------------------------------------------------------------------------------------------------------------------------------------------------------------------------------------------------------------------------------------------------------------------------------------------------------------------------------------------------------------------------------------------------------------------------------------------------------------------------------------------------------------------------------------------------------------------------------------------------------------------------------------------------------------------------------------------------------------------------------------------------------------------------------------------------------------------------------------------------------------------------------------------------------------------------------------------------------------------------------------------------------------------------------------------------------------------------------------------------------------------------------------------------------------------------------------------------------------------------------------------------------------------------------------------------------------------------------------------------------------------------------------------------------------------------------|--|

|                                                     |    |                                                                                                                                                                                                                                                                                                                                                                                                                                                                                                                                                                                                                                                                                                                                                                                                                                                                                                            |           |
|-----------------------------------------------------|----|------------------------------------------------------------------------------------------------------------------------------------------------------------------------------------------------------------------------------------------------------------------------------------------------------------------------------------------------------------------------------------------------------------------------------------------------------------------------------------------------------------------------------------------------------------------------------------------------------------------------------------------------------------------------------------------------------------------------------------------------------------------------------------------------------------------------------------------------------------------------------------------------------------|-----------|
|                                                     |    | Quinapril*[TIAB] OR Ramipril*[TIAB] OR remikiren[TIAB] OR rentiapril[TIAB] OR Reserpine[TIAB] OR Rilmenidine[TIAB] OR ryodipine[TIAB] OR saprisartan potassium[TIAB] OR scoparone [TIAB] OR selexipag[TIAB] OR sesamin[TIAB] OR spirapril[TIAB] OR talinolol[TIAB] OR Telmisartan[TIAB] OR temocapril hydrochloride[TIAB] OR Teprotide[TIAB] OR Terlipressin[TIAB] OR tetrahydropalmatine[TIAB] OR theodrenaline[TIAB] OR tibolone[TIAB] OR Ticrynafen[TIAB] OR Timolol[TIAB] OR tobanum[TIAB] OR tocopherylquinone[TIAB] OR Todralazine[TIAB] OR Tolazoline[TIAB] OR Torsemide[TIAB] OR trandolapril[TIAB] OR Travoprost[TIAB] OR treprostinil[TIAB] OR Trichlormethiazide[TIAB] OR trimazosin[TIAB] OR Trimethaphan[TIAB] OR urapidil[TIAB] OR Valsartan[TIAB] OR Veratrum Alkaloids[TIAB] OR Vincamine[TIAB] OR viprostol[TIAB] OR Xipamide[TIAB] OR Y 26763[TIAB] OR Y 27632[TIAB] OR zofenopril[TIAB] |           |
| Blood pressure reduction (combined)                 | 6  | #4 OR #5                                                                                                                                                                                                                                                                                                                                                                                                                                                                                                                                                                                                                                                                                                                                                                                                                                                                                                   | 523,243   |
| Cognition (Controlled vocabulary)                   | 7  | "Cognition"[Mesh:NoExp] OR "Cognitive Dysfunction"[Mesh:NoExp] OR "Cognition Disorders"[Mesh:NoExp] OR "Neurocognitive Disorders"[Mesh:NoExp] OR "Dementia"[Mesh] OR "Memory"[Mesh:NoExp]                                                                                                                                                                                                                                                                                                                                                                                                                                                                                                                                                                                                                                                                                                                  | 373,550   |
| Cognition (Free vocabulary)                         | 8  | Cogn*[TIAB] or dement*[tiab] OR neurocogn*[TIAB] OR alzheimer*[tiab] OR (mental[TIAB] AND (Disorders[TIAB] OR decline[TIAB] OR impairment[TIAB] OR Deterioration[TIAB] OR syndromes[TIAB] OR Dysfunction[TIAB]))                                                                                                                                                                                                                                                                                                                                                                                                                                                                                                                                                                                                                                                                                           | 687,538   |
| Cognition (combined)                                | 9  | #7 OR #8                                                                                                                                                                                                                                                                                                                                                                                                                                                                                                                                                                                                                                                                                                                                                                                                                                                                                                   | 804,666   |
| Randomized controlled clinical trials search filter | 10 | ((randomized controlled trial[pt]) OR (controlled clinical trial[pt]) OR (randomized[tiab] OR randomised[tiab]) OR (placebo[tiab]) OR (drug therapy[sh]) OR (randomly[tiab]) OR (trial[tiab]) OR (groups[tiab]))                                                                                                                                                                                                                                                                                                                                                                                                                                                                                                                                                                                                                                                                                           | 4,910,325 |
| Combination of concepts                             | 11 | #3 AND 6 AND #9 AND #10                                                                                                                                                                                                                                                                                                                                                                                                                                                                                                                                                                                                                                                                                                                                                                                                                                                                                    | 2,109     |
| Human studies only                                  | 12 | #11 NOT (animals[MeSH] NOT humans[MeSH])                                                                                                                                                                                                                                                                                                                                                                                                                                                                                                                                                                                                                                                                                                                                                                                                                                                                   | 2,006     |

**b. Embase (Embase.com)**

Date of the search: 27-10-2020

Database limit: No database limit has been applied

| Concepts                                            | # | Search strategy                                                                                                                                                                                                                                                                                                                                                                                                                                                                                                                                                                                                                                                                                                                                                                                                                                                                                                                                                                                                                                                                                                                                                                                                                                                                                                                                                                                                                                                                                                                                                                                                                                                                                                                                                                                                                                                                                                                                                                                                                                                                                                     | Results   |
|-----------------------------------------------------|---|---------------------------------------------------------------------------------------------------------------------------------------------------------------------------------------------------------------------------------------------------------------------------------------------------------------------------------------------------------------------------------------------------------------------------------------------------------------------------------------------------------------------------------------------------------------------------------------------------------------------------------------------------------------------------------------------------------------------------------------------------------------------------------------------------------------------------------------------------------------------------------------------------------------------------------------------------------------------------------------------------------------------------------------------------------------------------------------------------------------------------------------------------------------------------------------------------------------------------------------------------------------------------------------------------------------------------------------------------------------------------------------------------------------------------------------------------------------------------------------------------------------------------------------------------------------------------------------------------------------------------------------------------------------------------------------------------------------------------------------------------------------------------------------------------------------------------------------------------------------------------------------------------------------------------------------------------------------------------------------------------------------------------------------------------------------------------------------------------------------------|-----------|
| Adult population<br>(Controlled vocabulary)         | 1 | 'adult'/exp OR 'aged'/exp                                                                                                                                                                                                                                                                                                                                                                                                                                                                                                                                                                                                                                                                                                                                                                                                                                                                                                                                                                                                                                                                                                                                                                                                                                                                                                                                                                                                                                                                                                                                                                                                                                                                                                                                                                                                                                                                                                                                                                                                                                                                                           | 8,947,301 |
| Adult population<br>(Free vocabulary)               | 2 | Adult\$:ab,ti OR (old* NEAR/2 (people OR person\$ OR adult\$ OR patient)):ab,ti OR elder*:ab,ti OR aged:ab,ti OR senior\$:ab,ti OR geriatr*:ti,ab OR "middle age":ab,ti                                                                                                                                                                                                                                                                                                                                                                                                                                                                                                                                                                                                                                                                                                                                                                                                                                                                                                                                                                                                                                                                                                                                                                                                                                                                                                                                                                                                                                                                                                                                                                                                                                                                                                                                                                                                                                                                                                                                             | 2,754,485 |
| Adult population<br>(Combined)                      | 3 | #1 OR #2                                                                                                                                                                                                                                                                                                                                                                                                                                                                                                                                                                                                                                                                                                                                                                                                                                                                                                                                                                                                                                                                                                                                                                                                                                                                                                                                                                                                                                                                                                                                                                                                                                                                                                                                                                                                                                                                                                                                                                                                                                                                                                            | 9,980,405 |
| Blood pressure reduction<br>(Controlled vocabulary) | 4 | 'antihypertensive agent'/exp                                                                                                                                                                                                                                                                                                                                                                                                                                                                                                                                                                                                                                                                                                                                                                                                                                                                                                                                                                                                                                                                                                                                                                                                                                                                                                                                                                                                                                                                                                                                                                                                                                                                                                                                                                                                                                                                                                                                                                                                                                                                                        | 758,646   |
| Blood pressure reduction<br>(Free vocabulary)       | 5 | antihypertens*:ti,ab OR "anti-hypertens*":ti,ab OR diuretic\$:ti,ab OR thiazide\$:ti,ab OR (calcium NEAR/2 (antagonist\$ OR Blocker\$)):ti,ab OR "angiotensin converting enzyme inhibitors":ti,ab OR "ACE Inhibitor\$:ti,ab OR "angiotensin receptor blocker\$:ti,ab OR Acebutolol:ti,ab OR Adrenomedullin:ti,ab OR AE0047:ti,ab OR alacepril:ti,ab OR Alprenolol:ti,ab OR ambrisentan:ti,ab OR Amlodipine:ti,ab OR amosulalol:ti,ab OR "angiotensin I":ti,ab OR aprikalim:ti,ab OR Atenolol:ti,ab OR "atrial natriuretic factor prohormone":ti,ab OR azepepexole:ti,ab OR benazepril*:ti,ab OR bendazole:ti,ab OR Bendroflumethiazide:ti,ab OR benoxathian:ti,ab OR Bepriidil:ti,ab OR berbamine:ti,ab OR Betaxolol:ti,ab OR Bethanidine:ti,ab OR bietaserpine:ti,ab OR bimakalim:ti,ab OR Bimatoprost:ti,ab OR Bisoprolol:ti,ab OR Bosentan:ti,ab OR "BQ 22-708":ti,ab OR "BQ 788":ti,ab OR "Bretylium Tosylate":ti,ab OR "Brimonidine Tartrate":ti,ab OR budralazine:ti,ab OR Bupranolol:ti,ab OR buthiazide:ti,ab OR cadralazine:ti,ab OR cafedrine:ti,ab OR candesartan:ti,ab OR candoxatril:ti,ab OR Captopril:ti,ab OR Carteolol:ti,ab OR Carvedilol:ti,ab OR Celiprolol:ti,ab OR ceronapril:ti,ab OR Chlorisondamine:ti,ab OR Chlorothiazide:ti,ab OR Chlorthalidone:ti,ab OR cicletanine:ti,ab OR Cilazapril:ti,ab OR cilazaprilat:ti,ab OR clentiazem:ti,ab OR Clonidine:ti,ab OR Cromakalim:ti,ab OR cyclo:ti,ab OR Cyclopenthiazide:ti,ab OR cyclothiazide:ti,ab OR dauricine:ti,ab OR Debrisoquin:ti,ab OR delapril:ti,ab OR "diallyl disulfide":ti,ab OR Diazoxide:ti,ab OR Dihydralazine:ti,ab OR Dihydroalprenolol:ti,ab OR Diltiazem:ti,ab OR dorzolamide:ti,ab OR Doxazosin:ti,ab OR efonidipine:ti,ab OR Enalapril*:ti,ab OR epanolol:ti,ab OR Eplerenone:ti,ab OR Epoprostenol:ti,ab OR eprosartan:ti,ab OR "essential 303 forte":ti,ab OR etozolin:ti,ab OR Felodipine:ti,ab OR Fenoldopam:ti,ab OR "ferulic acid":ti,ab OR "FK 409":ti,ab OR flesinoxan:ti,ab OR Fosinopril*:ti,ab OR grayanotoxin I:ti,ab OR Guanabenz:ti,ab OR guanadrel:ti,ab OR Guanethidine:ti,ab OR Guanfacine:ti,ab OR | 246,876   |

|                                     |   |                                                                                                                                                                                                                                                                                                                                                                                                                                                                                                                                                                                                                                                                                                                                                                                                                                                                                                                                                                                                                                                                                                                                                                                                                                                                                                                                                                                                                                                                                                                                                                                                                                                                                                                                                                                                                                                                                                                                                                                                                                                                                                                                                                                                                                                                                                                                                                                                                       |           |
|-------------------------------------|---|-----------------------------------------------------------------------------------------------------------------------------------------------------------------------------------------------------------------------------------------------------------------------------------------------------------------------------------------------------------------------------------------------------------------------------------------------------------------------------------------------------------------------------------------------------------------------------------------------------------------------------------------------------------------------------------------------------------------------------------------------------------------------------------------------------------------------------------------------------------------------------------------------------------------------------------------------------------------------------------------------------------------------------------------------------------------------------------------------------------------------------------------------------------------------------------------------------------------------------------------------------------------------------------------------------------------------------------------------------------------------------------------------------------------------------------------------------------------------------------------------------------------------------------------------------------------------------------------------------------------------------------------------------------------------------------------------------------------------------------------------------------------------------------------------------------------------------------------------------------------------------------------------------------------------------------------------------------------------------------------------------------------------------------------------------------------------------------------------------------------------------------------------------------------------------------------------------------------------------------------------------------------------------------------------------------------------------------------------------------------------------------------------------------------------|-----------|
|                                     |   | Hexamethonium:ti,ab OR Hydralazine:ti,ab OR Hydrochlorothiazide:ti,ab OR Hydroflumethiazide:ti,ab OR imidapril:ti,ab OR Indapamide:ti,ab OR indenolol:ti,ab OR Indoramin:ti,ab OR indorenate:ti,ab OR Irbesartan:ti,ab OR "isopropyl unoprostone":ti,ab OR Isradipine:ti,ab OR Kallidin:ti,ab OR Ketanserine:ti,ab OR "L 158809":ti,ab OR Labetalol:ti,ab OR lacidipine:ti,ab OR Latanoprost:ti,ab OR lercanidipine:ti,ab OR libenzapril:ti,ab OR linsidomine:ti,ab OR Lisinopril:ti,ab OR lofexidine:ti,ab OR Losartan:ti,ab OR manidipine:ti,ab OR Mecamylamine:ti,ab OR medroxalol:ti,ab OR "medullipin I":ti,ab OR Methyldopa:ti,ab OR Metipranolol:ti,ab OR Metolazone:ti,ab OR Metoprolol:ti,ab OR Mibefradil:ti,ab OR Minoxidil:ti,ab OR moexipril:ti,ab OR monatepil:ti,ab OR moxonidine:ti,ab OR Muzolimine:ti,ab OR Nadolol:ti,ab OR naftopidil:ti,ab OR Nebivolol:ti,ab OR Nicardipine:ti,ab OR Nicorandil:ti,ab OR niguldipine:ti,ab OR nilvadipine:ti,ab OR Nimodipine:ti,ab OR "NIP 121":ti,ab OR nipradilol:ti,ab OR Nisoldipine:ti,ab OR Nitrendipine:ti,ab OR Nitroprusside:ti,ab OR oleuropein:ti,ab OR olmesartan:ti,ab OR omapatrilat:ti,ab OR Oxprenolol:ti,ab OR Pargyline:ti,ab OR Pempidine:ti,ab OR Penbutolol:ti,ab OR "Pentolinium Tartrate":ti,ab OR Perindopril*:ti,ab OR Phenoxybenzamine:ti,ab OR Phentolamine:ti,ab OR Pinacidil:ti,ab OR Pindolol:ti,ab OR Piperoxan:ti,ab OR Polythiazide:ti,ab OR Prazosin:ti,ab OR Propranolol:ti,ab OR Protoveratrine:ti,ab OR Quinapril*:ti,ab OR Ramipril*:ti,ab OR remikiren:ti,ab OR rentiapril:ti,ab OR Reserpine:ti,ab OR Rilmenidine:ti,ab OR ryodipine:ti,ab OR "sapisartan potassium":ti,ab OR scoparone:ti,ab OR selexipag:ti,ab OR sesamin:ti,ab OR spirapril:ti,ab OR talinolol:ti,ab OR Telmisartan:ti,ab OR "temocapril hydrochloride":ti,ab OR Teprotide:ti,ab OR Terlipressin:ti,ab OR tetrahydropalmatine:ti,ab OR theodrenaline:ti,ab OR tibolone:ti,ab OR Ticrynafen:ti,ab OR Timolol:ti,ab OR tobanum:ti,ab OR tocopherylquinone:ti,ab OR Todralazine:ti,ab OR Tolazoline:ti,ab OR Toremide:ti,ab OR trandolapril:ti,ab OR Travoprost:ti,ab OR treprostinil:ti,ab OR Trichlormethiazide:ti,ab OR trimazosin:ti,ab OR Trimethaphan:ti,ab OR urapidil:ti,ab OR Valsartan:ti,ab OR "Veratrum Alkaloids":ti,ab OR Vincamine:ti,ab OR viprostol:ti,ab OR Xipamide:ti,ab OR "Y 26763":ti,ab OR "Y 27632":ti,ab OR zofenopril:ti,ab |           |
| Blood pressure reduction (combined) | 6 | #4 OR #5                                                                                                                                                                                                                                                                                                                                                                                                                                                                                                                                                                                                                                                                                                                                                                                                                                                                                                                                                                                                                                                                                                                                                                                                                                                                                                                                                                                                                                                                                                                                                                                                                                                                                                                                                                                                                                                                                                                                                                                                                                                                                                                                                                                                                                                                                                                                                                                                              | 815,353   |
| Cognition (Controlled vocabulary)   | 7 | 'cognition'/de OR 'cognitive defect'/de OR 'dementia'/exp OR 'mild cognitive impairment'/de OR 'disorders of higher cerebral function'/de OR 'memory'/de                                                                                                                                                                                                                                                                                                                                                                                                                                                                                                                                                                                                                                                                                                                                                                                                                                                                                                                                                                                                                                                                                                                                                                                                                                                                                                                                                                                                                                                                                                                                                                                                                                                                                                                                                                                                                                                                                                                                                                                                                                                                                                                                                                                                                                                              | 778,993   |
| Cognition (Free vocabulary)         | 8 | Cogn*:ab,ti or dement*:ab,ti OR neurocogn*:ab,ti OR alzheimer*:ab,ti OR (mental NEAR/2 (Disorders OR decline OR impairment OR Deterioration OR syndromes OR Dysfunction)):ab,ti                                                                                                                                                                                                                                                                                                                                                                                                                                                                                                                                                                                                                                                                                                                                                                                                                                                                                                                                                                                                                                                                                                                                                                                                                                                                                                                                                                                                                                                                                                                                                                                                                                                                                                                                                                                                                                                                                                                                                                                                                                                                                                                                                                                                                                       | 861,245   |
| Cognition                           | 9 | #7 OR #8                                                                                                                                                                                                                                                                                                                                                                                                                                                                                                                                                                                                                                                                                                                                                                                                                                                                                                                                                                                                                                                                                                                                                                                                                                                                                                                                                                                                                                                                                                                                                                                                                                                                                                                                                                                                                                                                                                                                                                                                                                                                                                                                                                                                                                                                                                                                                                                                              | 1,123,687 |

|                                                     |    |                                                                                                                                                                                                    |           |
|-----------------------------------------------------|----|----------------------------------------------------------------------------------------------------------------------------------------------------------------------------------------------------|-----------|
| (combined)                                          |    |                                                                                                                                                                                                    |           |
| Randomized controlled clinical trials search filter | 10 | 'randomized controlled trial'/de OR 'controlled clinical trial'/de OR randomized:ab,ti OR randomised:ab,ti OR placebo:ab,ti OR randomly:ab,ti OR trial:ab,ti OR groups:ab,ti OR 'drug therapy':lnk | 7,597,657 |
| Combination of concepts                             | 11 | #3 AND 6 AND #9 AND #10                                                                                                                                                                            | 5,592     |
| Human studies only                                  | 12 | #11 NOT ('animal'/exp NOT 'human'/exp)                                                                                                                                                             | 5,385     |

### c. Cochrane Library

Date of the search: 27-10-2020

Database limit: limit results to trials only

| Concepts                                            | # | Search strategy                                                                                                                                                                                                                                                                                                                                                                                                                                                                                                                                                                                                                                                                                                                                                                                                                                                                                                                                                                                                                                                                                                                                                                                                                                                                                                                                                                                                                                                                                                                                                                                                                                                                                                                                                                                                                                                                                                                                                                                                                                                             | Results |
|-----------------------------------------------------|---|-----------------------------------------------------------------------------------------------------------------------------------------------------------------------------------------------------------------------------------------------------------------------------------------------------------------------------------------------------------------------------------------------------------------------------------------------------------------------------------------------------------------------------------------------------------------------------------------------------------------------------------------------------------------------------------------------------------------------------------------------------------------------------------------------------------------------------------------------------------------------------------------------------------------------------------------------------------------------------------------------------------------------------------------------------------------------------------------------------------------------------------------------------------------------------------------------------------------------------------------------------------------------------------------------------------------------------------------------------------------------------------------------------------------------------------------------------------------------------------------------------------------------------------------------------------------------------------------------------------------------------------------------------------------------------------------------------------------------------------------------------------------------------------------------------------------------------------------------------------------------------------------------------------------------------------------------------------------------------------------------------------------------------------------------------------------------------|---------|
| Adult population<br>(Controlled vocabulary)         | 1 | [mh Adult]                                                                                                                                                                                                                                                                                                                                                                                                                                                                                                                                                                                                                                                                                                                                                                                                                                                                                                                                                                                                                                                                                                                                                                                                                                                                                                                                                                                                                                                                                                                                                                                                                                                                                                                                                                                                                                                                                                                                                                                                                                                                  | 458209  |
| Adult population<br>(Free vocabulary)               | 2 | Adult?:ab,ti OR (old* NEAR/2 (people OR person? OR adult? OR patient)):ab,ti OR elder*:ab,ti OR aged:ab,ti OR senior\$:ab,ti OR geriatr*:ti,ab OR "middle age":ab,ti                                                                                                                                                                                                                                                                                                                                                                                                                                                                                                                                                                                                                                                                                                                                                                                                                                                                                                                                                                                                                                                                                                                                                                                                                                                                                                                                                                                                                                                                                                                                                                                                                                                                                                                                                                                                                                                                                                        | 261941  |
| Adult population<br>(Combined)                      | 3 | #1 OR #2                                                                                                                                                                                                                                                                                                                                                                                                                                                                                                                                                                                                                                                                                                                                                                                                                                                                                                                                                                                                                                                                                                                                                                                                                                                                                                                                                                                                                                                                                                                                                                                                                                                                                                                                                                                                                                                                                                                                                                                                                                                                    | 643083  |
| Blood pressure reduction<br>(Controlled vocabulary) | 4 | [mh "Antihypertensive Agents"] OR [mh Diuretics] OR [mh Thiazides] OR [mh "Calcium Channel Blockers"] OR [mh "Angiotensin-Converting Enzyme Inhibitors"] OR [mh "Adrenergic beta-Antagonists"] OR [mh "Adrenergic alpha-2 Receptor Agonists"]                                                                                                                                                                                                                                                                                                                                                                                                                                                                                                                                                                                                                                                                                                                                                                                                                                                                                                                                                                                                                                                                                                                                                                                                                                                                                                                                                                                                                                                                                                                                                                                                                                                                                                                                                                                                                               | 19674   |
| Blood pressure reduction<br>(Free vocabulary)       | 5 | antihypertens*:ti,ab OR "anti-hypertens*":ti,ab OR diuretic\$:ti,ab OR thiazide\$:ti,ab OR (calcium NEAR/2 (antagonist\$ OR Blocker\$)):ti,ab OR "angiotensin converting enzyme inhibitors":ti,ab OR "ACE Inhibitor\$":ti,ab OR "angiotensin receptor blocker\$":ti,ab OR Acebutolol:ti,ab OR Adrenomedullin:ti,ab OR AE0047:ti,ab OR alacepril:ti,ab OR Alprenolol:ti,ab OR ambrisentan:ti,ab OR Amlodipine:ti,ab OR amosulalol:ti,ab OR "angiotensin I":ti,ab OR aprikalim:ti,ab OR Atenolol:ti,ab OR "atrial natriuretic factor prohormone":ti,ab OR azepepexole:ti,ab OR benazepril*:ti,ab OR bendazole:ti,ab OR Bendroflumethiazide:ti,ab OR benoxathian:ti,ab OR Bepridil:ti,ab OR berbamine:ti,ab OR Betaxolol:ti,ab OR Bethanidine:ti,ab OR bietaserpine:ti,ab OR bimakalim:ti,ab OR Bimatoprost:ti,ab OR Bisoprolol:ti,ab OR Bosentan:ti,ab OR "BQ 22-708":ti,ab OR "BQ 788":ti,ab OR "Bretylium Tosylate":ti,ab OR "Brimonidine Tartrate":ti,ab OR budralazine:ti,ab OR Bupranolol:ti,ab OR buthiazide:ti,ab OR cadralazine:ti,ab OR cafedrine:ti,ab OR candesartan:ti,ab OR candoxatril:ti,ab OR Captopril:ti,ab OR Carteolol:ti,ab OR Carvedilol:ti,ab OR Celiprolol:ti,ab OR ceronapril:ti,ab OR Chlorisondamine:ti,ab OR Chlorothiazide:ti,ab OR Chlorthalidone:ti,ab OR cicletanine:ti,ab OR Cilazapril:ti,ab OR cilazaprilat:ti,ab OR clentiazem:ti,ab OR Clonidine:ti,ab OR Cromakalim:ti,ab OR cyclo:ti,ab OR Cyclopenthiiazide:ti,ab OR cyclothiazide:ti,ab OR dauricine:ti,ab OR Debrisoquin:ti,ab OR delapril:ti,ab OR "diallyl disulfide":ti,ab OR Diazoxide:ti,ab OR Dihydralazine:ti,ab OR Dihydroalprenolol:ti,ab OR Diltiazem:ti,ab OR dorzolamide:ti,ab OR Doxazosin:ti,ab OR efonidipine:ti,ab OR Enalapril*:ti,ab OR epanolol:ti,ab OR Eplerenone:ti,ab OR Epoprostenol:ti,ab OR eprosartan:ti,ab OR "essential 303 forte":ti,ab OR etozolin:ti,ab OR Felodipine:ti,ab OR Fenoldopam:ti,ab OR "ferulic acid":ti,ab OR "FK 409":ti,ab OR flesinoxan:ti,ab OR Fosinopril*:ti,ab OR grayanotoxin I:ti,ab OR Guanabenz:ti,ab OR guanadrel:ti,ab OR | 57307   |



|                                     |   |                                                                                                                                                                                                                                                                                                                                                                                                                                                                                                                                                                                                                                                                                                                                                                                                                                                                                                                                                                                                                                                                                                                                                                                                                                                                                                                                                                                                                                                                                                                                                                                                                                                                                                                                                                                                                                                                                                                                                                                                                                                                                                                                                                                                                                                                                                                                                                                                                                                                 |       |
|-------------------------------------|---|-----------------------------------------------------------------------------------------------------------------------------------------------------------------------------------------------------------------------------------------------------------------------------------------------------------------------------------------------------------------------------------------------------------------------------------------------------------------------------------------------------------------------------------------------------------------------------------------------------------------------------------------------------------------------------------------------------------------------------------------------------------------------------------------------------------------------------------------------------------------------------------------------------------------------------------------------------------------------------------------------------------------------------------------------------------------------------------------------------------------------------------------------------------------------------------------------------------------------------------------------------------------------------------------------------------------------------------------------------------------------------------------------------------------------------------------------------------------------------------------------------------------------------------------------------------------------------------------------------------------------------------------------------------------------------------------------------------------------------------------------------------------------------------------------------------------------------------------------------------------------------------------------------------------------------------------------------------------------------------------------------------------------------------------------------------------------------------------------------------------------------------------------------------------------------------------------------------------------------------------------------------------------------------------------------------------------------------------------------------------------------------------------------------------------------------------------------------------|-------|
|                                     |   | Guanethidine:ti,ab OR Guanfacine:ti,ab OR Hexamethonium:ti,ab OR Hydralazine:ti,ab OR Hydrochlorothiazide:ti,ab OR Hydroflumethiazide:ti,ab OR imidapril:ti,ab OR Indapamide:ti,ab OR indenolol:ti,ab OR Indoramin:ti,ab OR indorenate:ti,ab OR Irbesartan:ti,ab OR "isopropyl unoprostone":ti,ab OR Isradipine:ti,ab OR Kallidin:ti,ab OR Ketanserin:ti,ab OR "L 158809":ti,ab OR Labetalol:ti,ab OR lacidipine:ti,ab OR Latanoprost:ti,ab OR lercanidipine:ti,ab OR libenzapril:ti,ab OR linsidomine:ti,ab OR Lisinopril:ti,ab OR lofexidine:ti,ab OR Losartan:ti,ab OR manidipine:ti,ab OR Mecamylamine:ti,ab OR medroxalol:ti,ab OR "medullipin I":ti,ab OR Methyldopa:ti,ab OR Metipranolol:ti,ab OR Metolazone:ti,ab OR Metoprolol:ti,ab OR Mibefradil:ti,ab OR Minoxidil:ti,ab OR moexipril:ti,ab OR monatepil:ti,ab OR moxonidine:ti,ab OR Muzolimine:ti,ab OR Nadolol:ti,ab OR naftopidil:ti,ab OR Nebivolol:ti,ab OR Nicardipine:ti,ab OR Nicorandil:ti,ab OR niguldipine:ti,ab OR nilvadipine:ti,ab OR Nimodipine:ti,ab OR "NIP 121":ti,ab OR nipradilol:ti,ab OR Nisoldipine:ti,ab OR Nitrendipine:ti,ab OR Nitroprusside:ti,ab OR oleuropein:ti,ab OR olmesartan:ti,ab OR omapatrilat:ti,ab OR Oxprenolol:ti,ab OR Pargyline:ti,ab OR Pempidine:ti,ab OR Penbutolol:ti,ab OR "Pentolinium Tartrate":ti,ab OR Perindopril*:ti,ab OR Phenoxybenzamine:ti,ab OR Phentolamine:ti,ab OR Pinacidil:ti,ab OR Pindolol:ti,ab OR Piperoxan:ti,ab OR Polythiazide:ti,ab OR Prazosin:ti,ab OR Propranolol:ti,ab OR Protoveratrines:ti,ab OR Quinapril*:ti,ab OR Ramipril*:ti,ab OR remikiren:ti,ab OR rentiapril:ti,ab OR Reserpine:ti,ab OR Rilmenidine:ti,ab OR ryodipine:ti,ab OR "sapisartan potassium":ti,ab OR scoparone:ti,ab OR selexipag:ti,ab OR sesamin:ti,ab OR spirapril:ti,ab OR talinolol:ti,ab OR Telmisartan:ti,ab OR "temocapril hydrochloride":ti,ab OR Teprotide:ti,ab OR Terlipressin:ti,ab OR tetrahydropalmatine:ti,ab OR theodrenaline:ti,ab OR tibolone:ti,ab OR Ticrynafen:ti,ab OR Timolol:ti,ab OR tobanum:ti,ab OR tocopherylquinone:ti,ab OR Todralazine:ti,ab OR Tolazoline:ti,ab OR Toremide:ti,ab OR trandolapril:ti,ab OR Travoprost:ti,ab OR treprostinil:ti,ab OR Trichlormethiazide:ti,ab OR trimazosin:ti,ab OR Trimethaphan:ti,ab OR urapidil:ti,ab OR Valsartan:ti,ab OR "Veratrum Alkaloids":ti,ab OR Vincamine:ti,ab OR viprostol:ti,ab OR Xipamide:ti,ab OR "Y 26763":ti,ab OR "Y 27632":ti,ab OR zofenopril:ti,ab |       |
| Blood pressure reduction (combined) | 6 | #4 OR #5                                                                                                                                                                                                                                                                                                                                                                                                                                                                                                                                                                                                                                                                                                                                                                                                                                                                                                                                                                                                                                                                                                                                                                                                                                                                                                                                                                                                                                                                                                                                                                                                                                                                                                                                                                                                                                                                                                                                                                                                                                                                                                                                                                                                                                                                                                                                                                                                                                                        | 62225 |
| Cognition (Controlled vocabulary)   | 7 | [mh ^"Cognition"] OR [mh ^"Cognitive Dysfunction"] OR [mh ^"Cognition Disorders"] OR [mh ^"Neurocognitive Disorders"] OR [mh "Dementia"] OR [mh ^"Memory"]                                                                                                                                                                                                                                                                                                                                                                                                                                                                                                                                                                                                                                                                                                                                                                                                                                                                                                                                                                                                                                                                                                                                                                                                                                                                                                                                                                                                                                                                                                                                                                                                                                                                                                                                                                                                                                                                                                                                                                                                                                                                                                                                                                                                                                                                                                      | 18154 |
| Cognition (Free vocabulary)         | 8 | Cogn*:ab,ti or dement*:ab,ti OR neurocogn*:ab,ti OR alzheimer*:ab,ti OR (mental NEAR/2 (Disorders OR decline OR impairment OR Deterioration OR syndromes OR Dysfunction)):ab,ti                                                                                                                                                                                                                                                                                                                                                                                                                                                                                                                                                                                                                                                                                                                                                                                                                                                                                                                                                                                                                                                                                                                                                                                                                                                                                                                                                                                                                                                                                                                                                                                                                                                                                                                                                                                                                                                                                                                                                                                                                                                                                                                                                                                                                                                                                 | 88420 |
| Cognition                           | 9 | #7 OR #8                                                                                                                                                                                                                                                                                                                                                                                                                                                                                                                                                                                                                                                                                                                                                                                                                                                                                                                                                                                                                                                                                                                                                                                                                                                                                                                                                                                                                                                                                                                                                                                                                                                                                                                                                                                                                                                                                                                                                                                                                                                                                                                                                                                                                                                                                                                                                                                                                                                        |       |

|                         |    |                  |     |
|-------------------------|----|------------------|-----|
| (combined)              |    |                  |     |
| Combination of concepts | 10 | #3 AND #6 AND #9 | 736 |
| Trials only             | 11 | n/a              | 726 |

#### d. PsycInfo (OVID)

Date of the search: 27-10-2020

Database limit: No database limit has been applied

| Concepts                                                  | # | Search strategy                                                                                                                                                                                                                                                                                                                                                                                                                                                                                                                                                                                                                                                                                                                                                                                                                                                                                                                                                                                                                                                                                                                                                                                                                                                                                                                                                                                                                                                                                                                                                                                                                                                                                                                                                                                                                                                                                                                                                                                                                                                                                                                                                                                                              | Results |
|-----------------------------------------------------------|---|------------------------------------------------------------------------------------------------------------------------------------------------------------------------------------------------------------------------------------------------------------------------------------------------------------------------------------------------------------------------------------------------------------------------------------------------------------------------------------------------------------------------------------------------------------------------------------------------------------------------------------------------------------------------------------------------------------------------------------------------------------------------------------------------------------------------------------------------------------------------------------------------------------------------------------------------------------------------------------------------------------------------------------------------------------------------------------------------------------------------------------------------------------------------------------------------------------------------------------------------------------------------------------------------------------------------------------------------------------------------------------------------------------------------------------------------------------------------------------------------------------------------------------------------------------------------------------------------------------------------------------------------------------------------------------------------------------------------------------------------------------------------------------------------------------------------------------------------------------------------------------------------------------------------------------------------------------------------------------------------------------------------------------------------------------------------------------------------------------------------------------------------------------------------------------------------------------------------------|---------|
| Adult population<br>(Controlled<br>vocabulary)            | 1 | 300.ag                                                                                                                                                                                                                                                                                                                                                                                                                                                                                                                                                                                                                                                                                                                                                                                                                                                                                                                                                                                                                                                                                                                                                                                                                                                                                                                                                                                                                                                                                                                                                                                                                                                                                                                                                                                                                                                                                                                                                                                                                                                                                                                                                                                                                       | 1933385 |
| Adult population<br>(Free vocabulary)                     | 2 | Adult?.ab,ti OR (old* adj2 (people OR person? OR adult?<br>OR patient)).ab,ti OR elder*.ab,ti OR aged.ab,ti OR<br>senior?.ab,ti OR geriatric*.ti,ab OR "middle age".ab,ti                                                                                                                                                                                                                                                                                                                                                                                                                                                                                                                                                                                                                                                                                                                                                                                                                                                                                                                                                                                                                                                                                                                                                                                                                                                                                                                                                                                                                                                                                                                                                                                                                                                                                                                                                                                                                                                                                                                                                                                                                                                    | 706114  |
| Adult population<br>(Combined)                            | 3 | 1 OR 2                                                                                                                                                                                                                                                                                                                                                                                                                                                                                                                                                                                                                                                                                                                                                                                                                                                                                                                                                                                                                                                                                                                                                                                                                                                                                                                                                                                                                                                                                                                                                                                                                                                                                                                                                                                                                                                                                                                                                                                                                                                                                                                                                                                                                       | 2178411 |
| Blood pressure<br>reduction<br>(Controlled<br>vocabulary) | 4 | exp antihypertensive drugs/ OR exp diuretics/ OR channel<br>blockers/ OR (Angiotensin/ AND Enzyme Inhibitors/) OR<br>Adrenergic Receptors/                                                                                                                                                                                                                                                                                                                                                                                                                                                                                                                                                                                                                                                                                                                                                                                                                                                                                                                                                                                                                                                                                                                                                                                                                                                                                                                                                                                                                                                                                                                                                                                                                                                                                                                                                                                                                                                                                                                                                                                                                                                                                   | 11029   |
| Blood pressure<br>reduction<br>(Free vocabulary)          | 5 | antihypertens*.ti,ab OR "anti-hypertens*".ti,ab OR<br>diuretic?.ti,ab OR thiazide?.ti,ab OR (calcium adj2<br>(antagonist? OR Blocker?)).ti,ab OR "angiotensin<br>converting enzyme inhibitors".ti,ab OR "ACE<br>Inhibitor?".ti,ab OR "angiotensin receptor blocker?".ti,ab<br>OR Acebutolol.ti,ab OR Adrenomedullin.ti,ab OR<br>AE0047.ti,ab OR alacepril.ti,ab OR Alprenolol.ti,ab OR<br>ambrisentan.ti,ab OR Amlodipine.ti,ab OR amosulalol.ti,ab<br>OR "angiotensin I".ti,ab OR aprikalim.ti,ab OR<br>Atenolol.ti,ab OR "atrial natriuretic factor prohormone".ti,ab<br>OR azepevole.ti,ab OR benazepril*.ti,ab OR<br>bendazole.ti,ab OR Bendroflumethiazide.ti,ab OR<br>benoxathian.ti,ab OR Bepridil.ti,ab OR berbamine.ti,ab<br>OR Betaxolol.ti,ab OR Bethanidine.ti,ab OR<br>bietaserpine.ti,ab OR bimakalim.ti,ab OR Bimatoprost.ti,ab<br>OR Bisoprolol.ti,ab OR Bosentan.ti,ab OR "BQ 22-<br>708".ti,ab OR "BQ 788".ti,ab OR "Bretylum Tosylate".ti,ab<br>OR "Brimonidine Tartrate".ti,ab OR budralazine.ti,ab OR<br>Bupranolol.ti,ab OR buthiazide.ti,ab OR cadralazine.ti,ab<br>OR cafedrine.ti,ab OR candesrtan.ti,ab OR<br>candoxatril.ti,ab OR Captopril.ti,ab OR Carteolol.ti,ab OR<br>Carvedilol.ti,ab OR Celiprolol.ti,ab OR ceronapril.ti,ab OR<br>Chlorisondamine.ti,ab OR Chlorothiazide.ti,ab OR<br>Chlorthalidone.ti,ab OR cicletanine.ti,ab OR Cilazapril.ti,ab<br>OR cilazaprilat.ti,ab OR clentiazem.ti,ab OR Clonidine.ti,ab<br>OR Cromakalim.ti,ab OR cyclo.ti,ab OR<br>Cyclopenthiiazide.ti,ab OR cyclothiazide.ti,ab OR<br>dauricine.ti,ab OR Debrisoquin.ti,ab OR delapril.ti,ab OR<br>"diallyl disulfide".ti,ab OR Diazoxide.ti,ab OR<br>Dihydralazine.ti,ab OR Dihydroalprenolol.ti,ab OR<br>Diltiazem.ti,ab OR dorzolamide.ti,ab OR Doxazosin.ti,ab<br>OR efonidipine.ti,ab OR Enalapril*.ti,ab OR epanolol.ti,ab<br>OR Eplerenone.ti,ab OR Epoprostenol.ti,ab OR<br>eprosartan.ti,ab OR "essential 303 forte".ti,ab OR<br>etozolin.ti,ab OR Felodipine.ti,ab OR Fenoldopam.ti,ab OR<br>"ferulic acid".ti,ab OR "FK 409".ti,ab OR flesinoxan.ti,ab<br>OR Fosinopril*.ti,ab OR grayanotoxin I.ti,ab OR<br>Guanabenz.ti,ab OR guanadrel.ti,ab OR<br>Guanethidine.ti,ab OR Guanfacine.ti,ab OR | 14975   |

|                                     |   |                                                                                                                                                                                                                                                                                                                                                                                                                                                                                                                                                                                                                                                                                                                                                                                                                                                                                                                                                                                                                                                                                                                                                                                                                                                                                                                                                                                                                                                                                                                                                                                                                                                                                                                                                                                                                                                                                                                                                                                                                                                                                                                                                                                                                                                                                                                                                                                                                       |        |
|-------------------------------------|---|-----------------------------------------------------------------------------------------------------------------------------------------------------------------------------------------------------------------------------------------------------------------------------------------------------------------------------------------------------------------------------------------------------------------------------------------------------------------------------------------------------------------------------------------------------------------------------------------------------------------------------------------------------------------------------------------------------------------------------------------------------------------------------------------------------------------------------------------------------------------------------------------------------------------------------------------------------------------------------------------------------------------------------------------------------------------------------------------------------------------------------------------------------------------------------------------------------------------------------------------------------------------------------------------------------------------------------------------------------------------------------------------------------------------------------------------------------------------------------------------------------------------------------------------------------------------------------------------------------------------------------------------------------------------------------------------------------------------------------------------------------------------------------------------------------------------------------------------------------------------------------------------------------------------------------------------------------------------------------------------------------------------------------------------------------------------------------------------------------------------------------------------------------------------------------------------------------------------------------------------------------------------------------------------------------------------------------------------------------------------------------------------------------------------------|--------|
|                                     |   | Hexamethonium.ti,ab OR Hydralazine.ti,ab OR Hydrochlorothiazide.ti,ab OR Hydroflumethiazide.ti,ab OR imidapril.ti,ab OR Indapamide.ti,ab OR indenolol.ti,ab OR Indoramin.ti,ab OR indorenate.ti,ab OR Irbesartan.ti,ab OR "isopropyl unoprostone".ti,ab OR Isradipine.ti,ab OR Kallidin.ti,ab OR Ketanserin.ti,ab OR "L 158809".ti,ab OR Labetalol.ti,ab OR lacidipine.ti,ab OR Latanoprost.ti,ab OR lercanidipine.ti,ab OR libenzapril.ti,ab OR linsidomine.ti,ab OR Lisinopril.ti,ab OR lofexidine.ti,ab OR Losartan.ti,ab OR manidipine.ti,ab OR Mecamylamine.ti,ab OR medroxalol.ti,ab OR "medullipin I".ti,ab OR Methyldopa.ti,ab OR Metipranolol.ti,ab OR Metolazone.ti,ab OR Metoprolol.ti,ab OR Mibefradil.ti,ab OR Minoxidil.ti,ab OR moexipril.ti,ab OR monatepil.ti,ab OR moxonidine.ti,ab OR Muzolimine.ti,ab OR Nadolol.ti,ab OR naftopidil.ti,ab OR Nebivolol.ti,ab OR Nicardipine.ti,ab OR Nicorandil.ti,ab OR niguldipine.ti,ab OR nilvadipine.ti,ab OR Nimodipine.ti,ab OR "NIP 121".ti,ab OR nipradilol.ti,ab OR Nisoldipine.ti,ab OR Nitrendipine.ti,ab OR Nitroprusside.ti,ab OR oleuropein.ti,ab OR olmesartan.ti,ab OR omapatrilat.ti,ab OR Oxprenolol.ti,ab OR Pargyline.ti,ab OR Pempidine.ti,ab OR Penbutolol.ti,ab OR "Pentolinium Tartrate".ti,ab OR Perindopril*.ti,ab OR Phenoxybenzamine.ti,ab OR Phentolamine.ti,ab OR Pinacidil.ti,ab OR Pindolol.ti,ab OR Piperoxan.ti,ab OR Polythiazide.ti,ab OR Prazosin.ti,ab OR Propranolol.ti,ab OR Protoveratrines.ti,ab OR Quinapril*.ti,ab OR Ramipril*.ti,ab OR remikiren.ti,ab OR rentiapril.ti,ab OR Reserpine.ti,ab OR Rilmenidine.ti,ab OR ryodipine.ti,ab OR "sapisartan potassium".ti,ab OR scoparone.ti,ab OR selexipag.ti,ab OR sesamin.ti,ab OR spirapril.ti,ab OR talinolol.ti,ab OR Telmisartan.ti,ab OR "temocapril hydrochloride".ti,ab OR Teprotide.ti,ab OR Terlipressin.ti,ab OR tetrahydropalmatine.ti,ab OR theodrenaline.ti,ab OR tibolone.ti,ab OR Ticrynafen.ti,ab OR Timolol.ti,ab OR tobanum.ti,ab OR tocopherylquinone.ti,ab OR Todralazine.ti,ab OR Tolazoline.ti,ab OR Toremide.ti,ab OR trandolapril.ti,ab OR Travoprost.ti,ab OR treprostinil.ti,ab OR Trichlormethiazide.ti,ab OR trimazosin.ti,ab OR Trimethaphan.ti,ab OR urapidil.ti,ab OR Valsartan.ti,ab OR "Veratrum Alkaloids".ti,ab OR Vincamine.ti,ab OR viprostol.ti,ab OR Xipamide.ti,ab OR "Y 26763".ti,ab OR "Y 27632".ti,ab OR zofenopril.ti,ab |        |
| Blood pressure reduction (combined) | 6 | 4 OR 5                                                                                                                                                                                                                                                                                                                                                                                                                                                                                                                                                                                                                                                                                                                                                                                                                                                                                                                                                                                                                                                                                                                                                                                                                                                                                                                                                                                                                                                                                                                                                                                                                                                                                                                                                                                                                                                                                                                                                                                                                                                                                                                                                                                                                                                                                                                                                                                                                | 21892  |
| Cognition (Controlled vocabulary)   | 7 | Cognition/ OR Cognitive Impairment/ OR Mild Cognitive Impairment/ OR exp dementia/ OR Memory/ OR Neurocognitive Disorders/ OR Alzheimer's Disease/                                                                                                                                                                                                                                                                                                                                                                                                                                                                                                                                                                                                                                                                                                                                                                                                                                                                                                                                                                                                                                                                                                                                                                                                                                                                                                                                                                                                                                                                                                                                                                                                                                                                                                                                                                                                                                                                                                                                                                                                                                                                                                                                                                                                                                                                    | 196056 |
| Cognition (Free vocabulary)         | 8 | Cogn*.ti,ab or dement*.ti,ab OR neurocogn*.ti,ab OR alzheimer*.ti,ab OR (mental adj2 (Disorders OR decline OR impairment OR Deterioration OR syndromes OR Dysfunction)).ti,ab                                                                                                                                                                                                                                                                                                                                                                                                                                                                                                                                                                                                                                                                                                                                                                                                                                                                                                                                                                                                                                                                                                                                                                                                                                                                                                                                                                                                                                                                                                                                                                                                                                                                                                                                                                                                                                                                                                                                                                                                                                                                                                                                                                                                                                         | 576586 |
| Cognition                           | 9 | 7 OR 8                                                                                                                                                                                                                                                                                                                                                                                                                                                                                                                                                                                                                                                                                                                                                                                                                                                                                                                                                                                                                                                                                                                                                                                                                                                                                                                                                                                                                                                                                                                                                                                                                                                                                                                                                                                                                                                                                                                                                                                                                                                                                                                                                                                                                                                                                                                                                                                                                | 634280 |

|                                                     |    |                                                                                                                                                         |        |
|-----------------------------------------------------|----|---------------------------------------------------------------------------------------------------------------------------------------------------------|--------|
| (combined)                                          |    |                                                                                                                                                         |        |
| Randomized controlled clinical trials search filter | 10 | Randomized Controlled Trial/ OR Drug Therapy/ OR randomized.ab,ti OR randomised.ab,ti OR placebo.ab,ti OR randomly.ab,ti OR trial.ab,ti OR groups.ab,ti | 774771 |
| Combination of concepts                             | 11 | 3 AND 6 AND 9 AND 10                                                                                                                                    | 767    |

## e. CINAHL

Date of the search: 27-10-2020

Database limit: No database limit has been applied

| Concepts                                            | # | Search strategy                                                                                                                                                                                                                                                                                                                                                                                                                                                                                                                                                                                                                                                                                                                                                                                                                                                                                                                                                                                                                                                                                                                                                                                                                                                                                                                                                                                                                                                                                                                                                                                                                                                                                                                                                  | Results   |
|-----------------------------------------------------|---|------------------------------------------------------------------------------------------------------------------------------------------------------------------------------------------------------------------------------------------------------------------------------------------------------------------------------------------------------------------------------------------------------------------------------------------------------------------------------------------------------------------------------------------------------------------------------------------------------------------------------------------------------------------------------------------------------------------------------------------------------------------------------------------------------------------------------------------------------------------------------------------------------------------------------------------------------------------------------------------------------------------------------------------------------------------------------------------------------------------------------------------------------------------------------------------------------------------------------------------------------------------------------------------------------------------------------------------------------------------------------------------------------------------------------------------------------------------------------------------------------------------------------------------------------------------------------------------------------------------------------------------------------------------------------------------------------------------------------------------------------------------|-----------|
| Adult population<br>(Controlled vocabulary)         | 1 | MH ("Adult+" OR "Aged+" OR "Aged, 80 and Over+")                                                                                                                                                                                                                                                                                                                                                                                                                                                                                                                                                                                                                                                                                                                                                                                                                                                                                                                                                                                                                                                                                                                                                                                                                                                                                                                                                                                                                                                                                                                                                                                                                                                                                                                 | 1,834,613 |
| Adult population<br>(Free vocabulary)               | 2 | TI (Adult? OR (old* N2 (people OR person? OR adult? OR patient)) OR elder* OR aged OR senior? OR geriatric* OR "middle age") OR AB (Adult? OR (old* N2 (people OR person? OR adult? OR patient)) OR elder* OR aged OR senior? OR geriatric* OR "middle age")                                                                                                                                                                                                                                                                                                                                                                                                                                                                                                                                                                                                                                                                                                                                                                                                                                                                                                                                                                                                                                                                                                                                                                                                                                                                                                                                                                                                                                                                                                     | 600,863   |
| Adult population<br>(Combined)                      | 3 | S1 OR S2                                                                                                                                                                                                                                                                                                                                                                                                                                                                                                                                                                                                                                                                                                                                                                                                                                                                                                                                                                                                                                                                                                                                                                                                                                                                                                                                                                                                                                                                                                                                                                                                                                                                                                                                                         | 2,061,707 |
| Blood pressure reduction<br>(Controlled vocabulary) | 4 | MH ("Antihypertensive Agents+" OR "Diuretics+" OR "Diuretics, Thiazide" OR "Calcium Channel Blockers" OR "Calcium Channel Agonists" OR "Angiotensin-Converting Enzyme Inhibitors" OR "Adrenergic Beta-Antagonists+" OR "Receptors, Adrenergic, Alpha")                                                                                                                                                                                                                                                                                                                                                                                                                                                                                                                                                                                                                                                                                                                                                                                                                                                                                                                                                                                                                                                                                                                                                                                                                                                                                                                                                                                                                                                                                                           | 47,136    |
| Blood pressure reduction<br>(Free vocabulary)       | 5 | TI (antihypertens* OR "anti-hypertens*" OR diuretic? OR thiazide? OR (calcium adj2 (antagonist? OR Blocker?)) OR "angiotensin converting enzyme inhibitors" OR "ACE Inhibitor?" OR "angiotensin receptor blocker?" OR Acebutolol OR Adrenomedullin OR AE0047 OR alacepril OR Alprenolol OR ambrisentan OR Amlodipine OR amosulalol OR "angiotensin I" OR aprikalim OR Atenolol OR "atrial natriuretic factor prohormone" OR azepepexole OR benazepril* OR bendazole OR Bendroflumethiazide OR benoxathian OR Bepridil OR berbamine OR Betaxolol OR Bethanidine OR bietaserpine OR bimakalim OR Bimatoprost OR Bisoprolol OR Bosentan OR "BQ 22-708" OR "BQ 788" OR "Bretylum Tosylate" OR "Brimonidine Tartrate" OR budralazine OR Bupranolol OR buthiazide OR cadralazine OR cafedrine OR candesartan OR candoxatriol OR Captopril OR Carteolol OR Carvedilol OR Celiprolol OR ceronapril OR Chlorisondamine OR Chlorothiazide OR Chlorthalidone OR cicletanine OR Cilazapril OR cilazaprilat OR clientazem OR Clonidine OR Cromakalim OR cyclo OR Cyclopentiazide OR cyclothiazide OR dauricine OR Debrisoquin OR delapril OR "diallyl disulfide" OR Diazoxide OR Dihydralazine OR Dihydroalprenolol OR Diltiazem OR dorzolamide OR Doxazosin OR efonidipine OR Enalapril* OR epanolol OR Eplerenone OR Epoprostenol OR eprosartan OR "essential 303 forte" OR etozolin OR Felodipine OR Fenoldopam OR "ferulic acid" OR "FK 409" OR flesinoxan OR Fosinopril* OR grayanotoxin I OR Guanabenz OR guanadrel OR Guanethidine OR Guanfacine OR Hexamethonium OR Hydralazine OR Hydrochlorothiazide OR Hydroflumethiazide OR imidapril OR Indapamide OR indenolol OR Indoramin OR indorenate OR Irbesartan OR "isopropyl unoprostone" OR Isradipine OR Kallidin OR | 37,696    |

|  |                                                                                                                                                                                                                                                                                                                                                                                                                                                                                                                                                                                                                                                                                                                                                                                                                                                                                                                                                                                                                                                                                                                                                                                                                                                                                                                                                                                                                                                                                                                                                                                                                                                                                                                                                                                                                                                                                                                                                                                                                                                                                                                                                                                                                                                                                                                                                                                                                                                                                                                                                                                                                                                                                                                                                                                                                                                                                                                                                                                                                                                                                                                                                                                                                                                          |  |
|--|----------------------------------------------------------------------------------------------------------------------------------------------------------------------------------------------------------------------------------------------------------------------------------------------------------------------------------------------------------------------------------------------------------------------------------------------------------------------------------------------------------------------------------------------------------------------------------------------------------------------------------------------------------------------------------------------------------------------------------------------------------------------------------------------------------------------------------------------------------------------------------------------------------------------------------------------------------------------------------------------------------------------------------------------------------------------------------------------------------------------------------------------------------------------------------------------------------------------------------------------------------------------------------------------------------------------------------------------------------------------------------------------------------------------------------------------------------------------------------------------------------------------------------------------------------------------------------------------------------------------------------------------------------------------------------------------------------------------------------------------------------------------------------------------------------------------------------------------------------------------------------------------------------------------------------------------------------------------------------------------------------------------------------------------------------------------------------------------------------------------------------------------------------------------------------------------------------------------------------------------------------------------------------------------------------------------------------------------------------------------------------------------------------------------------------------------------------------------------------------------------------------------------------------------------------------------------------------------------------------------------------------------------------------------------------------------------------------------------------------------------------------------------------------------------------------------------------------------------------------------------------------------------------------------------------------------------------------------------------------------------------------------------------------------------------------------------------------------------------------------------------------------------------------------------------------------------------------------------------------------------------|--|
|  | <p> Ketanserin OR "L 158809" OR Labetalol OR lacidipine OR<br/> Latanoprost OR lercanidipine OR libenzapril OR<br/> linsidomine OR Lisinopril OR lofedidine OR Losartan OR<br/> manidipine OR Mecamylamine OR medroxalol OR<br/> "medullipin I" OR Methyldopa OR Metipranolol OR<br/> Metolazone OR Metoprolol OR Mibefradil OR Minoxidil<br/> OR moexipril OR monatepil OR moxonidine OR<br/> Muzolimine OR Nadolol OR naftopidil OR Nebivolol OR<br/> Nicardipine OR Nicorandil OR niguldipine OR nilvadipine<br/> OR Nimodipine OR "NIP 121" OR nipradilol OR<br/> Nisoldipine OR Nitrendipine OR Nitroprusside OR<br/> oleuropein OR olmesartan OR omapatrilat OR Oxprenolol<br/> OR Pargyline OR Pempidine OR Penbutolol OR<br/> "Pentolinium Tartrate" OR Perindopril* OR<br/> Phenoxybenzamine OR Phentolamine OR Pinacidil OR<br/> Pindolol OR Piperoxan OR Polythiazide OR Prazosin OR<br/> Propranolol OR Protoveratrine OR Quinapril* OR<br/> Ramipril* OR remikiren OR rentiapril OR Reserpine OR<br/> Rilmenidine OR ryodipine OR "sapisartan potassium" OR<br/> scoparone OR selexipag OR sesamin OR spirapril OR<br/> talinolol OR Telmisartan OR "temocapril hydrochloride"<br/> OR Teprotide OR Terlipressin OR tetrahydropalmatine<br/> OR theodrenaline OR tibolone OR Ticrynafen OR Timolol<br/> OR tobanum OR tocopherylquinone OR Todralazine OR<br/> Tolazoline OR Torsemide OR trandolapril OR Travoprost<br/> OR treprostinil OR Trichlormethiazide OR trimazosin OR<br/> Trimethaphan OR urapidil OR Valsartan OR "Veratrum<br/> Alkaloids" OR Vincamine OR viprostol OR Xipamide OR<br/> "Y 26763" OR "Y 27632" OR zofenopril) OR AB<br/> (antihypertens* OR "anti-hypertens*" OR diuretic? OR<br/> thiazide? OR (calcium adj2 (antagonist? OR Blocker?))<br/> OR "angiotensin converting enzyme inhibitors" OR "ACE<br/> Inhibitor?" OR "angiotensin receptor blocker?" OR<br/> Acebutolol OR Adrenomedullin OR AE0047 OR alacepril<br/> OR Alprenolol OR ambrisentan OR Amlodipine OR<br/> amosulalol OR "angiotensin I" OR aprikalim OR Atenolol<br/> OR "atrial natriuretic factor prohormone" OR azepevole<br/> OR benazepril* OR bendazole OR Bendroflumethiazide<br/> OR benoxathian OR Bepridil OR berbamine OR<br/> Betaxolol OR Bethanidine OR bietaserpine OR bimakalim<br/> OR Bimatoprost OR Bisoprolol OR Bosentan OR "BQ 22-<br/> 708" OR "BQ 788" OR "Bretylum Tosylate" OR<br/> "Brimonidine Tartrate" OR budralazine OR Bupranolol OR<br/> buthiazide OR cadralazine OR cafedrine OR candesrtan<br/> OR candoxatriol OR Captopril OR Carteolol OR Carvedilol<br/> OR Celiprolol OR ceronapril OR Chlorisondamine OR<br/> Chlorothiazide OR Chlorthalidone OR cicletanine OR<br/> Cilazapril OR cilazaprilat OR clentiazem OR Clonidine OR<br/> Cromakalim OR cyclo OR Cyclopentiazide OR<br/> cyclothiazide OR dauricine OR Debrisoquin OR delapril<br/> OR "diallyl disulfide" OR Diazoxide OR Dihydralazine OR<br/> Dihydroalprenolol OR Diltiazem OR dorzolamide OR<br/> Doxazosin OR efonidipine OR Enalapril* OR epanolol OR<br/> Eplerenone OR Epoprostenol OR eprosartan OR<br/> "essential 303 forte" OR etozolin OR Felodipine OR<br/> Fenoldopam OR "ferulic acid" OR "FK 409" OR flesinoxan </p> |  |
|--|----------------------------------------------------------------------------------------------------------------------------------------------------------------------------------------------------------------------------------------------------------------------------------------------------------------------------------------------------------------------------------------------------------------------------------------------------------------------------------------------------------------------------------------------------------------------------------------------------------------------------------------------------------------------------------------------------------------------------------------------------------------------------------------------------------------------------------------------------------------------------------------------------------------------------------------------------------------------------------------------------------------------------------------------------------------------------------------------------------------------------------------------------------------------------------------------------------------------------------------------------------------------------------------------------------------------------------------------------------------------------------------------------------------------------------------------------------------------------------------------------------------------------------------------------------------------------------------------------------------------------------------------------------------------------------------------------------------------------------------------------------------------------------------------------------------------------------------------------------------------------------------------------------------------------------------------------------------------------------------------------------------------------------------------------------------------------------------------------------------------------------------------------------------------------------------------------------------------------------------------------------------------------------------------------------------------------------------------------------------------------------------------------------------------------------------------------------------------------------------------------------------------------------------------------------------------------------------------------------------------------------------------------------------------------------------------------------------------------------------------------------------------------------------------------------------------------------------------------------------------------------------------------------------------------------------------------------------------------------------------------------------------------------------------------------------------------------------------------------------------------------------------------------------------------------------------------------------------------------------------------------|--|

|                                                     |    |                                                                                                                                                                                                                                                                                                                                                                                                                                                                                                                                                                                                                                                                                                                                                                                                                                                                                                                                                                                                                                                                                                                                                                                                                                                                                                                                                                                                                                                                                                                                                                                                                                                                                                                                                                                                                          |           |
|-----------------------------------------------------|----|--------------------------------------------------------------------------------------------------------------------------------------------------------------------------------------------------------------------------------------------------------------------------------------------------------------------------------------------------------------------------------------------------------------------------------------------------------------------------------------------------------------------------------------------------------------------------------------------------------------------------------------------------------------------------------------------------------------------------------------------------------------------------------------------------------------------------------------------------------------------------------------------------------------------------------------------------------------------------------------------------------------------------------------------------------------------------------------------------------------------------------------------------------------------------------------------------------------------------------------------------------------------------------------------------------------------------------------------------------------------------------------------------------------------------------------------------------------------------------------------------------------------------------------------------------------------------------------------------------------------------------------------------------------------------------------------------------------------------------------------------------------------------------------------------------------------------|-----------|
|                                                     |    | OR Fosinopril* OR grayanotoxin I OR Guanabenz OR guanadrel OR Guanethidine OR Guanfacine OR Hexamethonium OR Hydralazine OR Hydrochlorothiazide OR Hydroflumethiazide OR imidapril OR Indapamide OR indenolol OR Indoramin OR indorenate OR Irbesartan OR "isopropyl unoprostone" OR Isradipine OR Kallidin OR Ketanserin OR "L 158809" OR Labetalol OR lacidipine OR Latanoprost OR lercanidipine OR libenzapril OR linsidomine OR Lisinopril OR lofexidine OR Losartan OR manidipine OR Mecamylamine OR medroxalol OR "medullipin I" OR Methyldopa OR Metipranolol OR Metolazone OR Metoprolol OR Mibefradil OR Minoxidil OR moexipril OR monatepil OR moxonidine OR Muzolimine OR Nadolol OR naftopidil OR Nebivolol OR Nicardipine OR Nicorandil OR niguldipine OR nilvadipine OR Nimodipine OR "NIP 121" OR nipradilol OR Nisoldipine OR Nitrendipine OR Nitroprusside OR oleuropein OR olmesartan OR omapatrilat OR Oxprenolol OR Pargyline OR Pempidine OR Penbutolol OR "Pentolinium Tartrate" OR Perindopril* OR Phenoxybenzamine OR Phentolamine OR Pinacidil OR Pindolol OR Piperoxan OR Polythiazide OR Prazosin OR Propranolol OR Protoveratrines OR Quinapril* OR Ramipril* OR remikiren OR rentiapril OR Reserpine OR Rilmenidine OR ryodipine OR "sapisartan potassium" OR scoparone OR selexipag OR sesamin OR spirapril OR talinolol OR Telmisartan OR "temocapril hydrochloride" OR Teprotide OR Terlipressin OR tetrahydropalmatine OR theodrenaline OR tibolone OR Ticrynafen OR Timolol OR tobanum OR tocopherylquinone OR Todralazine OR Tolazoline OR Toremide OR trandolapril OR Travoprost OR treprostinil OR Trichlormethiazide OR trimazosin OR Trimethaphan OR urapidil OR Valsartan OR "Veratrum Alkaloids" OR Vincamine OR viprostol OR Xipamide OR "Y 26763" OR "Y 27632" OR zofenopril) |           |
| Blood pressure reduction (combined)                 | 6  | S4 OR S5                                                                                                                                                                                                                                                                                                                                                                                                                                                                                                                                                                                                                                                                                                                                                                                                                                                                                                                                                                                                                                                                                                                                                                                                                                                                                                                                                                                                                                                                                                                                                                                                                                                                                                                                                                                                                 | 64,698    |
| Cognition (Controlled vocabulary)                   | 7  | MH (Cognition OR "Cognition Disorders" OR "Mild Cognitive Impairment" OR "Dementia+" OR Memory OR "Alzheimer's Disease")                                                                                                                                                                                                                                                                                                                                                                                                                                                                                                                                                                                                                                                                                                                                                                                                                                                                                                                                                                                                                                                                                                                                                                                                                                                                                                                                                                                                                                                                                                                                                                                                                                                                                                 | 160,623   |
| Cognition (Free vocabulary)                         | 8  | TI (Cogn* OR dement* OR neurocogn* OR alzheimer* OR (mental N2 (Disorders OR decline OR impairment OR Deterioration OR syndromes OR Dysfunction))) OR AB (Cogn* OR dement* OR neurocogn* OR alzheimer* OR (mental N2 (Disorders OR decline OR impairment OR Deterioration OR syndromes OR Dysfunction)))                                                                                                                                                                                                                                                                                                                                                                                                                                                                                                                                                                                                                                                                                                                                                                                                                                                                                                                                                                                                                                                                                                                                                                                                                                                                                                                                                                                                                                                                                                                 | 219,805   |
| Cognition (combined)                                | 9  | S7 OR S8                                                                                                                                                                                                                                                                                                                                                                                                                                                                                                                                                                                                                                                                                                                                                                                                                                                                                                                                                                                                                                                                                                                                                                                                                                                                                                                                                                                                                                                                                                                                                                                                                                                                                                                                                                                                                 | 275,020   |
| Randomized controlled clinical trials search filter | 10 | MH "Clinical Trials+" OR MW "DT" OR TI randomized OR AB randomized OR TI randomised OR AB randomised OR TI placebo OR AB placebo OR TI randomly OR AB randomly OR TI trial OR AB trial OR TI groups OR AB groups                                                                                                                                                                                                                                                                                                                                                                                                                                                                                                                                                                                                                                                                                                                                                                                                                                                                                                                                                                                                                                                                                                                                                                                                                                                                                                                                                                                                                                                                                                                                                                                                         | 1,485,116 |
| Combination of concepts                             | 11 | S3 AND S6 AND S9 AND S10                                                                                                                                                                                                                                                                                                                                                                                                                                                                                                                                                                                                                                                                                                                                                                                                                                                                                                                                                                                                                                                                                                                                                                                                                                                                                                                                                                                                                                                                                                                                                                                                                                                                                                                                                                                                 | 720       |



## f. Web of Science

Date of the search: 27-10-2020

Database limit: No database limit has been applied

| Concepts                 | # | Search strategy                                                                                                                                                                                                                                                                                                                                                                                                                                                                                                                                                                                                                                                                                                                                                                                                                                                                                                                                                                                                                                                                                                                                                                                                                                                                                                                                                                                                                                                                                                                                                                                                                                                                                                                                                                                                                                                                                                                                                                                                                                                                                                                                                                                                                                                                                                                                                                                                                       | Results   |
|--------------------------|---|---------------------------------------------------------------------------------------------------------------------------------------------------------------------------------------------------------------------------------------------------------------------------------------------------------------------------------------------------------------------------------------------------------------------------------------------------------------------------------------------------------------------------------------------------------------------------------------------------------------------------------------------------------------------------------------------------------------------------------------------------------------------------------------------------------------------------------------------------------------------------------------------------------------------------------------------------------------------------------------------------------------------------------------------------------------------------------------------------------------------------------------------------------------------------------------------------------------------------------------------------------------------------------------------------------------------------------------------------------------------------------------------------------------------------------------------------------------------------------------------------------------------------------------------------------------------------------------------------------------------------------------------------------------------------------------------------------------------------------------------------------------------------------------------------------------------------------------------------------------------------------------------------------------------------------------------------------------------------------------------------------------------------------------------------------------------------------------------------------------------------------------------------------------------------------------------------------------------------------------------------------------------------------------------------------------------------------------------------------------------------------------------------------------------------------------|-----------|
| Adult population         | 1 | TS=(Adult\$ OR (old* NEAR/2 (people OR person\$ OR adult\$ OR patient)) OR elder* OR aged OR senior\$ OR geriatri* OR "middle age")                                                                                                                                                                                                                                                                                                                                                                                                                                                                                                                                                                                                                                                                                                                                                                                                                                                                                                                                                                                                                                                                                                                                                                                                                                                                                                                                                                                                                                                                                                                                                                                                                                                                                                                                                                                                                                                                                                                                                                                                                                                                                                                                                                                                                                                                                                   | 4,810,683 |
| Blood pressure reduction | 2 | TS=(antihypertens* OR "anti-hypertens*" OR diuretic\$ OR thiazide\$ OR (calcium NEAR/2 (antagonist\$ OR Blocker\$)) OR "angiotensin converting enzyme inhibitors" OR "ACE Inhibitor\$" OR "angiotensin receptor blocker\$" OR Acebutolol OR Adrenomedullin OR AE0047 OR alacepril OR Alprenolol OR ambrisentan OR Amlodipine OR amosulalol OR "angiotensin I" OR apikalim OR Atenolol OR "atrial natriuretic factor prohormone" OR azepevole OR benazepril* OR bendazole OR Bendroflumethiazide OR benoxathian OR Bepridil OR berbamine OR Betaxolol OR Bethanidine OR bietaserpine OR bimakalim OR Bimatoprost OR Bisoprolol OR Bosentan OR "BQ 22-708" OR "BQ 788" OR "Bretylum Tosylate" OR "Brimonidine Tartrate" OR budralazine OR Bupranolol OR buthiazide OR cadralazine OR cafedrine OR candesartan OR candoxatril OR Captopril OR Carteolol OR Carvedilol OR Celiprolol OR ceronapril OR Chlorisondamine OR Chlorothiazide OR Chlorthalidone OR cicletanine OR Cilazapril OR cilazaprilat OR clentiazem OR Clonidine OR Cromakalim OR cyclo OR Cyclopentiazide OR cyclothiazide OR dauricine OR Debrisoquin OR delapril OR "diallyl disulfide" OR Diazoxide OR Dihydralazine OR Dihydroalprenolol OR Diltiazem OR dorzolamide OR Doxazosin OR efonidipine OR Enalapril* OR epanolol OR Eplerenone OR Epoprostenol OR eprosartan OR "essential 303 forte" OR etozolin OR Felodipine OR Fenoldopam OR "ferulic acid" OR "FK 409" OR flesinoxan OR Fosinopril* OR grayanotoxin I OR Guanabenz OR guanadrel OR Guanethidine OR Guanfacine OR Hexamethonium OR Hydralazine OR Hydrochlorothiazide OR Hydroflumethiazide OR imidapril OR Indapamide OR indenolol OR Indoramin OR indorenate OR Irbesartan OR "isopropyl unoprostone" OR Isradipine OR Kallidin OR Ketanserin OR "L 158809" OR Labetalol OR lacidipine OR Latanoprost OR lercanidipine OR libenzapril OR linsidomine OR Lisinopril OR lofexidine OR Losartan OR manidipine OR Mecamylamine OR medroxalol OR "medullipin I" OR Methyldopa OR Metipranolol OR Metolazone OR Metoprolol OR Mibefradil OR Minoxidil OR moexipril OR monatepil OR moxonidine OR Muzolimine OR Nadolol OR naftopidil OR Nebivolol OR Nicardipine OR Nicorandil OR niguldipine OR nilvadipine OR Nimodipine OR "NIP 121" OR nipradilol OR Nisoldipine OR Nitrendipine OR Nitroprusside OR oleuropein OR olmesartan OR omapatrilat OR Oxprenolol OR Pargyline OR Pempidine OR Penbutolol OR | 389,476   |

|                                                     |   |                                                                                                                                                                                                                                                                                                                                                                                                                                                                                                                                                                                                                                                                                                                                                                                                                                          |           |
|-----------------------------------------------------|---|------------------------------------------------------------------------------------------------------------------------------------------------------------------------------------------------------------------------------------------------------------------------------------------------------------------------------------------------------------------------------------------------------------------------------------------------------------------------------------------------------------------------------------------------------------------------------------------------------------------------------------------------------------------------------------------------------------------------------------------------------------------------------------------------------------------------------------------|-----------|
|                                                     |   | "Pentolinium Tartrate" OR Perindopril* OR Phenoxybenzamine OR Phentolamine OR Pinacidil OR Pindolol OR Piperoxan OR Polythiazide OR Prazosin OR Propranolol OR Protoveratrine OR Quinapril* OR Ramipril* OR remikiren OR rentiapril OR Reserpine OR Rilmenidine OR ryodipine OR "sapisartan potassium" OR scoparone OR selexipag OR sesamin OR spirapril OR talinolol OR Telmisartan OR "temocapril hydrochloride" OR Teprotide OR Terlipressin OR tetrahydropalmatine OR theodrenaline OR tibolone OR Ticrynafen OR Timolol OR tobanum OR tocopherylquinone OR Todralazine OR Tolazoline OR Torsemide OR trandolapril OR Travoprost OR treprostinil OR Trichlormethiazide OR trimazosin OR Trimethaphan OR urapidil OR Valsartan OR "Veratrum Alkaloids" OR Vincamine OR viprostol OR Xipamide OR "Y 26763" OR "Y 27632" OR zofenopril) |           |
| Cognition                                           | 3 | TS=(Cogn* or dement* OR neurocogn* OR alzheimer* OR (mental NEAR/2 (Disorders OR decline OR impairment OR Deterioration OR syndromes OR Dysfunction)))                                                                                                                                                                                                                                                                                                                                                                                                                                                                                                                                                                                                                                                                                   | 1,085,140 |
| Randomized controlled clinical trials search filter | 4 | TS=(randomized OR randomised OR placebo OR randomly OR trial OR groups OR "drug therapy")                                                                                                                                                                                                                                                                                                                                                                                                                                                                                                                                                                                                                                                                                                                                                | 6,700,023 |
| Combination of concepts                             | 5 | #1 AND #2 AND #3 AND #4                                                                                                                                                                                                                                                                                                                                                                                                                                                                                                                                                                                                                                                                                                                                                                                                                  | 1,228     |

**eTable 2. Additional Demographic Characteristics of Studies Included in Quantitative Analyses**

| Trial (year)              | Mean age (years, SD) | Female (%) | Caucasians (%) | Smokers (%) | Hypertension (%) | Diabetes mellitus (%) | CKD (%) | CAD (%) | Cognitively healthy (%)   | MCI (%)                 | Prevention of cognitive decline         | Prevention of stroke |
|---------------------------|----------------------|------------|----------------|-------------|------------------|-----------------------|---------|---------|---------------------------|-------------------------|-----------------------------------------|----------------------|
| ACCORD BP (2010) [27, 28] | 62.2 (6.9)           | 47.7       | 60.5           | 55.1        | N/A              | 100.0                 | N/A     | 33.7    | N/A (ACCORD-MIND : 100.0) | N/A (ACCORD-MIND : 0.0) | Mixed (ACCORD-MIND: primary prevention) | Mixed                |
| SPS3 (2013) [29, 30]      | 63.0 (11)            | 37.0       | 51.0           | 20.0        | 75.0             | 37.0                  | N/A     | 11.0    | 55.3                      | 44.7                    | Mixed                                   | Secondary prevention |
| SPRINT (2015) [15, 31-34] | 67.9 (9.5)           | 35.6       | 57.7           | 55.7        | 100.0            | 0.0                   | 28.3    | 20.1    | N/A                       | N/A                     | Mixed                                   | Primary prevention   |
| PODCAST (2017) [35-37]    | 74.0 (6.8)           | 22.9       | N/A            | 67.5        | 83.1             | 20.5                  | N/A     | 24.1    | 55.8                      | 44.2                    | Mixed                                   | Secondary prevention |
| INFINITY (2019) [38, 39]  | 80.5 (4.1)           | 54.0       | 87.0           | 60.8        | 100.0            | 16.0                  | 23.0    | 39.0    | N/A                       | N/A                     | Mixed                                   | Primary prevention   |

Abbreviations: CAD, coronary artery disease; CKD, chronic kidney disease; MCI, mild cognitive impairment; N/A, not available; SD, standard deviation.

**eTable 3. Subgroup Analysis for the Outcome of Cognitive Decline**

| Outcome              | Subgroups                       | Trials    | Participants<br>(intensive/standard) | Weight                 | Effect Estimate (95% CI) | I <sup>2</sup> |
|----------------------|---------------------------------|-----------|--------------------------------------|------------------------|--------------------------|----------------|
| Cognitive decline    | Total                           | 4         | 2606/2640                            | 100.0%                 | SMD 0.01 (-0.04, 0.06)   | 0%             |
|                      | Follow-up                       |           |                                      |                        |                          |                |
|                      | Up to 3 years                   | 2         | 439/447                              | 16.9%                  | SMD 0.09 (-0.04, 0.22)   | 0%             |
|                      | More than 3 years               | 2         | 2167/2193                            | 83.1%                  | SMD -0.01 (-0.07, 0.05)  | 0%             |
|                      | Age                             |           |                                      |                        |                          |                |
|                      | < 65 years old                  | 2         | 1091/1151                            | 42.7%                  | SMD 0.02 (-0.08, 0.12)   | 25%            |
|                      | > 65 years old                  | 2         | 1515/1489                            | 57.3%                  | SMD 0.01 (-0.07, 0.08)   | 0%             |
|                      | Diabetes                        |           |                                      |                        |                          |                |
|                      | Diabetic patients               | 1         | 745/694                              | 27.4%                  | SMD 0.02 (-0.08, 0.12)   | -              |
|                      | Non-diabetic patients           | 1         | 1473/1448                            | 55.7%                  | SMD 0.00 (-0.07, 0.07)   | -              |
|                      | Mixed                           | 2         | 439/447                              | 16.9%                  | SMD 0.09 (-0.04, 0.22)   | 0%             |
|                      | Prevention of cognitive decline |           |                                      |                        |                          |                |
|                      | Primary prevention              | 1         | 694/745                              | 27.4%                  | SMD -0.02 (-0.12, 0.08)  | -              |
|                      | Secondary prevention            | 0         | 0/0                                  | 0%                     | -                        | -              |
|                      | Mixed                           | 3         | 1912/1895                            | 72.6%                  | SMD 0.02 (-0.04, 0.08)   | 0%             |
|                      | Prevention of stroke            |           |                                      |                        |                          |                |
|                      | Primary prevention              | 1         | 1473/1448                            | 55.7%                  | SMD 0.00 (-0.07, 0.07)   | -              |
|                      | Secondary prevention            | 2         | 439/447                              | 16.9%                  | SMD 0.09 (-0.04, 0.22)   | 0%             |
|                      | Mixed                           | 1         | 694/745                              | 27.4%                  | SMD -0.02 (-0.12, 0.08)  | -              |
|                      | Risk of bias                    |           |                                      |                        |                          |                |
| Low risk of bias     | 0                               | 0/0       | 0%                                   | -                      | -                        |                |
| Unclear risk of bias | 4                               | 2606/2640 | 100.0%                               | SMD 0.01 (-0.04, 0.06) | 0%                       |                |
| High risk of bias    | 0                               | 0/0       | 0%                                   | -                      | -                        |                |

Abbreviations: CI, confidence interval; SMD, standardized mean difference.

**eTable 4. Subgroup Analysis for the Outcome of Probable Dementia**

| Outcome              | Subgroups                       | Trials    | Participants<br>(intensive/standard) | Weight               | Effect Estimate (95% CI) | I <sup>2</sup> |
|----------------------|---------------------------------|-----------|--------------------------------------|----------------------|--------------------------|----------------|
| Probable dementia    | Total                           | 2         | 4719/4725                            | 100.0%               | RR 1.09 (0.32, 3.67)     | 27%            |
|                      | Follow-up                       |           |                                      |                      |                          |                |
|                      | Up to 3 years                   | 1         | 41/42                                | 13.8%                | RR 5.12 (0.25, 103.48)   | -              |
|                      | More than 3 years               | 1         | 4678/4683                            | 86.2%                | RR 0.85 (0.68, 1.05)     | -              |
|                      | Age                             |           |                                      |                      |                          |                |
|                      | < 65 years old                  | 0         | 0/0                                  | 0%                   | -                        | -              |
|                      | > 65 years old                  | 2         | 4719/4725                            | 100.0%               | RR 1.09 (0.32, 3.67)     | 27%            |
|                      | Diabetes                        |           |                                      |                      |                          |                |
|                      | Diabetic patients               | 0         | 0/0                                  | 0%                   | -                        | -              |
|                      | Non-diabetic patients           | 1         | 4678/4683                            | 86.2%                | RR 0.85 (0.68, 1.05)     | -              |
|                      | Mixed                           | 1         | 41/42                                | 13.8%                | RR 5.12 (0.25, 103.48)   | -              |
|                      | Prevention of cognitive decline |           |                                      |                      |                          |                |
|                      | Primary prevention              | 0         | 0/0                                  | 0%                   | -                        | -              |
|                      | Secondary prevention            | 0         | 0/0                                  | 0%                   | -                        | -              |
|                      | Mixed                           | 2         | 4719/4725                            | 100.0%               | RR 1.09 (0.32, 3.67)     | 27%            |
|                      | Prevention of stroke            |           |                                      |                      |                          |                |
|                      | Primary prevention              | 1         | 4678/4683                            | 86.2%                | RR 0.85 (0.68, 1.05)     | -              |
|                      | Secondary prevention            | 1         | 41/42                                | 13.8%                | RR 5.12 (0.25, 103.48)   | -              |
|                      | Mixed                           | 0         | 0/0                                  | 0%                   | -                        | -              |
|                      | Risk of bias                    |           |                                      |                      |                          |                |
| Low risk of bias     | 0                               | 0/0       | 0%                                   | -                    | -                        |                |
| Unclear risk of bias | 2                               | 4719/4725 | 100.0%                               | RR 1.09 (0.32, 3.67) | 27%                      |                |
| High risk of bias    | 0                               | 0/0       | 0%                                   | -                    | -                        |                |

Abbreviations: CI, confidence interval; RR, risk ratio.

**eTable 5. Subgroup Analysis for the Outcome of Mild Cognitive Impairment**

| Outcome                   | Subgroups                       | Trials    | Participants<br>(intensive/standard) | Weight               | Effect Estimate (95% CI) | I <sup>2</sup> |
|---------------------------|---------------------------------|-----------|--------------------------------------|----------------------|--------------------------|----------------|
| Mild cognitive impairment | Total                           | 2         | 5391/5383                            | 100.0%               | RR 0.91 (0.73, 1.14)     | 74%            |
|                           | Follow-up                       |           |                                      |                      |                          |                |
|                           | Up to 3 years                   | 1         | 713/700                              | 48.2%                | RR 1.02 (0.86, 1.22)     | -              |
|                           | More than 3 years               | 1         | 4678/4683                            | 51.8%                | RR 0.81 (0.70, 0.95)     | -              |
|                           | Age                             |           |                                      |                      |                          |                |
|                           | < 65 years old                  | 1         | 713/700                              | 48.2%                | RR 1.02 (0.86, 1.22)     | -              |
|                           | > 65 years old                  | 1         | 4678/4683                            | 51.8%                | RR 0.81 (0.70, 0.95)     | -              |
|                           | Diabetes                        |           |                                      |                      |                          |                |
|                           | Diabetic patients               | 0         | 0/0                                  | 0%                   | -                        | -              |
|                           | Non-diabetic patients           | 1         | 4678/4683                            | 51.8%                | RR 0.81 (0.70, 0.95)     | -              |
|                           | Mixed                           | 1         | 713/700                              | 48.2%                | RR 1.02 (0.86, 1.22)     | -              |
|                           | Prevention of cognitive decline |           |                                      |                      |                          |                |
|                           | Primary prevention              | 0         | 0/0                                  | 0%                   | -                        | -              |
|                           | Secondary prevention            | 0         | 0/0                                  | 0%                   | -                        | -              |
|                           | Mixed                           | 2         | 5391/5383                            | 100.0%               | RR 0.91 (0.73, 1.14)     | 74%            |
|                           | Prevention of stroke            |           |                                      |                      |                          |                |
|                           | Primary prevention              | 1         | 4678/4683                            | 51.8%                | RR 0.81 (0.70, 0.95)     | -              |
|                           | Secondary prevention            | 1         | 713/700                              | 48.2%                | RR 1.02 (0.86, 1.22)     | -              |
|                           | Mixed                           | 0         | 0/0                                  | 0%                   | -                        | -              |
|                           | Risk of bias                    |           |                                      |                      |                          |                |
| Low risk of bias          | 0                               | 0/0       | 0%                                   | -                    | -                        |                |
| Unclear risk of bias      | 0                               | 0/0       | 0%                                   | -                    | -                        |                |
| High risk of bias         | 2                               | 5391/5383 | 100.0%                               | RR 0.91 (0.73, 1.14) | 74%                      |                |

Abbreviations: CI, confidence interval; RR, risk ratio.

**eTable 6. Subgroup Analysis for the Outcome of Cerebrovascular Events**

| Outcome                | Subgroups                       | Trials    | Participants<br>(intensive/standard) | Weight               | Effect Estimate (95% CI) | I <sup>2</sup> |
|------------------------|---------------------------------|-----------|--------------------------------------|----------------------|--------------------------|----------------|
| Cerebrovascular events | Total                           | 5         | 8681/8715                            | 100.0%               | RR 0.79 (0.67, 0.93)     | 0%             |
|                        | Follow-up                       |           |                                      |                      |                          |                |
|                        | Up to 3 years                   | 2         | 140/142                              | 1.1%                 | RR 0.41 (0.08, 2.08)     | 0%             |
|                        | More than 3 years               | 3         | 8541/8573                            | 98.9%                | RR 0.78 (0.63, 0.97)     | 28%            |
|                        | Age                             |           |                                      |                      |                          |                |
|                        | < 65 years old                  | 2         | 3863/3890                            | 73.9%                | RR 0.73 (0.52, 1.02)     | 56%            |
|                        | > 65 years old                  | 3         | 4818/4825                            | 26.1%                | RR 0.86 (0.62, 1.20)     | 0%             |
|                        | Diabetes                        |           |                                      |                      |                          |                |
|                        | Diabetic patients               | 1         | 2362/2371                            | 17.4%                | RR 0.58 (0.39, 0.88)     | -              |
|                        | Non-diabetic patients           | 1         | 4678/4683                            | 25.0%                | RR 0.89 (0.63, 1.24)     | -              |
|                        | Mixed                           | 3         | 1641/1661                            | 57.6%                | RR 0.82 (0.66, 1.03)     | 0%             |
|                        | Prevention of cognitive decline |           |                                      |                      |                          |                |
|                        | Primary prevention              | 0         | 0/0                                  | 0%                   | -                        | -              |
|                        | Secondary prevention            | 0         | 0/0                                  | 0%                   | -                        | -              |
|                        | Mixed                           | 5         | 8681/8715                            | 100.0%               | RR 0.79 (0.67, 0.93)     | 0%             |
|                        | Prevention of stroke            |           |                                      |                      |                          |                |
|                        | Primary prevention              | 2         | 4777/4783                            | 25.5%                | RR 0.88 (0.63, 1.23)     | 0%             |
|                        | Secondary prevention            | 2         | 1542/1561                            | 57.1%                | RR 0.82 (0.66, 1.03)     | 0%             |
|                        | Mixed                           | 1         | 2362/2371                            | 17.4%                | RR 0.58 (0.39, 0.88)     | -              |
|                        | Risk of bias                    |           |                                      |                      |                          |                |
| Low risk of bias       | 0                               | 0/0       | 0%                                   | -                    | -                        |                |
| Unclear risk of bias   | 4                               | 8582/8615 | 99.5%                                | RR 0.78 (0.65, 0.95) | 10%                      |                |
| High risk of bias      | 1                               | 99/100    | 0.5%                                 | RR 0.51 (0.05, 5.48) | -                        |                |

Abbreviations: CI, confidence interval; RR, risk ratio.

**eTable 7. Subgroup Analysis for the Outcome of Serious Adverse Events**

| Outcome                | Subgroups                       | Trials    | Participants<br>(intensive/standard) | Weight               | Effect Estimate (95% CI) | I <sup>2</sup> |
|------------------------|---------------------------------|-----------|--------------------------------------|----------------------|--------------------------|----------------|
| Serious adverse events | Total                           | 5         | 8681/8715                            | 100.0%               | RR 1.13 (0.91, 1.40)     | 65%            |
|                        | Follow-up                       |           |                                      |                      |                          |                |
|                        | Up to 3 years                   | 2         | 140/142                              | 32.4%                | RR 0.91 (0.69, 1.20)     | 0%             |
|                        | More than 3 years               | 3         | 8541/8573                            | 67.6%                | RR 1.29 (0.91, 1.81)     | 80%            |
|                        | Age                             |           |                                      |                      |                          |                |
|                        | < 65 years old                  | 2         | 3863/3890                            | 32.4%                | RR 1.55 (1.22, 1.98)     | 0%             |
|                        | > 65 years old                  | 3         | 4818/4825                            | 67.6%                | RR 1.03 (0.98, 1.08)     | 0%             |
|                        | Diabetes                        |           |                                      |                      |                          |                |
|                        | Diabetic patients               | 1         | 2362/2371                            | 23.7%                | RR 1.55 (1.19, 2.02)     | -              |
|                        | Non-diabetic patients           | 1         | 4678/4683                            | 35.2%                | RR 1.03 (0.98, 1.09)     | -              |
|                        | Mixed                           | 3         | 1641/1661                            | 41.1%                | RR 1.00 (0.75, 1.34)     | 17%            |
|                        | Prevention of cognitive decline |           |                                      |                      |                          |                |
|                        | Primary prevention              | 0         | 0/0                                  | 0%                   | -                        | -              |
|                        | Secondary prevention            | 0         | 0/0                                  | 0%                   | -                        | -              |
|                        | Mixed                           | 5         | 8681/8715                            | 100.0%               | RR 1.13 (0.91, 1.40)     | 65%            |
|                        | Prevention of stroke            |           |                                      |                      |                          |                |
|                        | Primary prevention              | 2         | 4777/4783                            | 53.4%                | RR 1.03 (0.98, 1.09)     | 0%             |
|                        | Secondary prevention            | 2         | 1542/1561                            | 22.9%                | RR 1.09 (0.60, 1.98)     | 57%            |
|                        | Mixed                           | 1         | 2362/2371                            | 23.7%                | RR 1.55 (1.19, 2.02)     | -              |
|                        | Risk of bias                    |           |                                      |                      |                          |                |
| Low risk of bias       | 0                               | 0/0       | 0%                                   | -                    | -                        |                |
| Unclear risk of bias   | 4                               | 8582/8615 | 81.9%                                | RR 1.18 (0.89, 1.55) | 73%                      |                |
| High risk of bias      | 1                               | 99/100    | 18.1%                                | RR 0.96 (0.67, 1.37) | -                        |                |

Abbreviations: CI, confidence interval; RR, risk ratio.



**eTable 8. Subgroup Analysis for the Outcome of All-Cause Mortality**

| Outcome              | Subgroups                       | Trials    | Participants<br>(intensive/standard) | Weight               | Effect Estimate (95% CI) | I <sup>2</sup> |
|----------------------|---------------------------------|-----------|--------------------------------------|----------------------|--------------------------|----------------|
| All-cause mortality  | Total                           | 5         | 8681/8715                            | 100.0%               | RR 0.93 (0.75, 1.15)     | 48%            |
|                      | Follow-up                       |           |                                      |                      |                          |                |
|                      | Up to 3 years                   | 2         | 140/142                              | 3.8%                 | RR 0.90 (0.30, 2.66)     | 0%             |
|                      | More than 3 years               | 3         | 8541/8573                            | 96.2%                | RR 0.93 (0.73, 1.19)     | 71%            |
|                      | Age                             |           |                                      |                      |                          |                |
|                      | < 65 years old                  | 2         | 3863/3890                            | 61.5%                | RR 1.05 (0.89, 1.25)     | 0%             |
|                      | > 65 years old                  | 3         | 4818/4825                            | 38.5%                | RR 0.74 (0.61, 0.91)     | 0%             |
|                      | Diabetes                        |           |                                      |                      |                          |                |
|                      | Diabetic patients               | 1         | 2362/2371                            | 32.8%                | RR 1.05 (0.84, 1.30)     | -              |
|                      | Non-diabetic patients           | 1         | 4678/4683                            | 34.7%                | RR 0.74 (0.60, 0.91)     | -              |
|                      | Mixed                           | 3         | 1641/1661                            | 32.5%                | RR 1.05 (0.81, 1.36)     | 0%             |
|                      | Prevention of cognitive decline |           |                                      |                      |                          |                |
|                      | Primary prevention              | 0         | 0/0                                  | 0%                   | -                        | -              |
|                      | Secondary prevention            | 0         | 0/0                                  | 0%                   | -                        | -              |
|                      | Mixed                           | 5         | 8681/8715                            | 100.0%               | RR 0.93 (0.75, 1.15)     | 48%            |
|                      | Prevention of stroke            |           |                                      |                      |                          |                |
|                      | Primary prevention              | 2         | 4777/4783                            | 36.3%                | RR 0.73 (0.60, 0.90)     | 0%             |
|                      | Secondary prevention            | 2         | 1542/1561                            | 30.9%                | RR 1.07 (0.83, 1.39)     | 0%             |
|                      | Mixed                           | 1         | 2362/2371                            | 32.8%                | RR 1.05 (0.84, 1.30)     | -              |
|                      | Risk of bias                    |           |                                      |                      |                          |                |
| Low risk of bias     | 0                               | 0/0       | 0%                                   | -                    | -                        |                |
| Unclear risk of bias | 4                               | 8582/8615 | 98.4%                                | RR 0.94 (0.75, 1.18) | 58%                      |                |
| High risk of bias    | 1                               | 99/100    | 1.6%                                 | RR 0.51 (0.09, 2.69) | -                        |                |

Abbreviations: CI, confidence interval; RR, risk ratio.

**eFigure. Sensitivity Analysis Using Fixed-Effect Model for the Incidence of Probable Dementia**

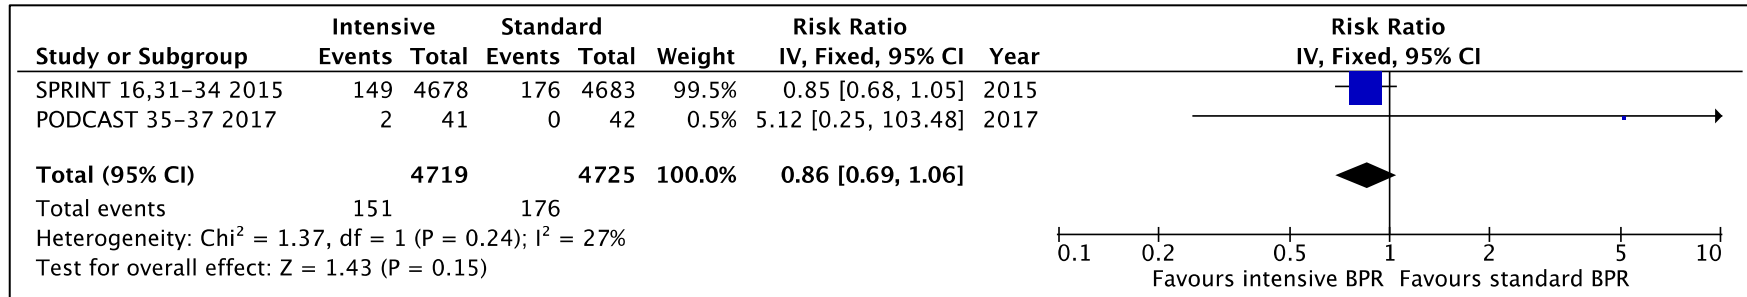

Abbreviations: BPR, blood pressure reduction; CI, confidence interval; IV, inverse variance.

The squares and bars represent the mean values and 95% CIs of the effect sizes. The area of the squares indicates the weight of each individual study. The diamond represents the combined effect in pooled studies and the vertical line represents the null value (no association).
